# Supplementary material for: Synthesis and comparison of nickel, palladium, and platinum bis(N-heterocyclic carbene) pincer complexes for electrocatalytic CO2 reduction
Source: Royal Society of Chemistry journal article supplement (doi:10.1039/c7dt04089j), 2018-01-01
Supplement: c7dt04089j1.pdf [file c7dt04089j1.pdf]

## Supporting Information

# Synthesis and Comparison of Nickel, Palladium, and Platinum Bis(N-Heterocyclic Carbene) Pincer Complexes for Electrocatalytic CO<sub>2</sub> Reduction

*J. A. Therrien, M. O. Wolf\*, B. O. Patrick*

Department of Chemistry, University of British Columbia,  
Vancouver, British Columbia, V6T 1Z1 Canada

### Contents

|                                                                                                                                                                   |     |
|-------------------------------------------------------------------------------------------------------------------------------------------------------------------|-----|
| Figure S1. <sup>1</sup> H NMR spectrum of as-synthesized [Ni(bC <sup>^</sup> N <sup>^</sup> bC)Cl]OTf as prepared by slow addition of the silver carbene reactant | S2  |
| Figure S2. <sup>1</sup> H NMR spectrum of as-synthesized [Pt(bC <sup>^</sup> N <sup>^</sup> bC)Br]OTf before further purification                                 | S2  |
| Figure S3. <sup>1</sup> H NMR spectrum of bC <sup>^</sup> N <sup>^</sup> bC · 2HBr                                                                                | S3  |
| Figure S4. <sup>1</sup> H NMR spectrum of [Ni(bC <sup>^</sup> N <sup>^</sup> bC)Cl]OTf                                                                            | S3  |
| Figure S5. <sup>1</sup> H NMR spectrum of [Ni(bC <sup>^</sup> N <sup>^</sup> bC)(CH <sub>3</sub> CN)](OTf) <sub>2</sub>                                           | S4  |
| Figure S6. <sup>1</sup> H NMR spectrum of [Ni(C <sup>^</sup> N <sup>^</sup> C)Cl]OTf                                                                              | S4  |
| Figure S7. <sup>1</sup> H NMR spectrum of [Pd(bC <sup>^</sup> N <sup>^</sup> bC)Cl]OTf                                                                            | S5  |
| Figure S8. <sup>1</sup> H NMR spectrum of [Pd(bC <sup>^</sup> N <sup>^</sup> bC)(CH <sub>3</sub> CN)](OTf) <sub>2</sub>                                           | S5  |
| Figure S9. <sup>1</sup> H NMR spectrum of [Pt(bC <sup>^</sup> N <sup>^</sup> bC)Br]OTf                                                                            | S6  |
| Figure S10. <sup>195</sup> Pt NMR spectrum of [Pt(bC <sup>^</sup> N <sup>^</sup> bC)Br]OTf                                                                        | S6  |
| Figure S11. <sup>1</sup> H NMR spectrum of [Pt(bC <sup>^</sup> N <sup>^</sup> bC)(CH <sub>3</sub> CN)](OTf) <sub>2</sub>                                          | S7  |
| Figure S12. ATR-FTIR spectrum of [Ni(bC <sup>^</sup> N <sup>^</sup> bC)Cl]OTf                                                                                     | S7  |
| Figure S13. ATR-FTIR spectrum of [Ni(bC <sup>^</sup> N <sup>^</sup> bC)(CH <sub>3</sub> CN)](OTf) <sub>2</sub>                                                    | S8  |
| Figure S14. ATR-FTIR spectrum of [Pd(bC <sup>^</sup> N <sup>^</sup> bC)Cl]OTf                                                                                     | S8  |
| Figure S15. ATR-FTIR spectrum of [Pd(bC <sup>^</sup> N <sup>^</sup> bC)(CH <sub>3</sub> CN)](OTf) <sub>2</sub>                                                    | S9  |
| Figure S16. ATR-FTIR spectrum of [Pt(bC <sup>^</sup> N <sup>^</sup> bC)Br]OTf                                                                                     | S9  |
| Figure S17. ATR-FTIR spectrum of [Pt(bC <sup>^</sup> N <sup>^</sup> bC)(CH <sub>3</sub> CN)](OTf) <sub>2</sub>                                                    | S10 |
| Figure S18. Variable temperature <sup>1</sup> H NMR spectrum of [Pd(bC <sup>^</sup> N <sup>^</sup> bC)Cl]BF <sub>4</sub>                                          | S10 |
| Figure S19. Overlaid cyclic voltammograms of [Ni(C <sup>^</sup> N <sup>^</sup> C)Cl]OTf under N <sub>2</sub> and CO <sub>2</sub>                                  | S11 |
| DFT Sample Input Code                                                                                                                                             | S11 |
| DFT Optimized Geometries                                                                                                                                          | S16 |
| Crystallography Details for [Ni(bC <sup>^</sup> N <sup>^</sup> bC)Cl]OTf                                                                                          | S22 |

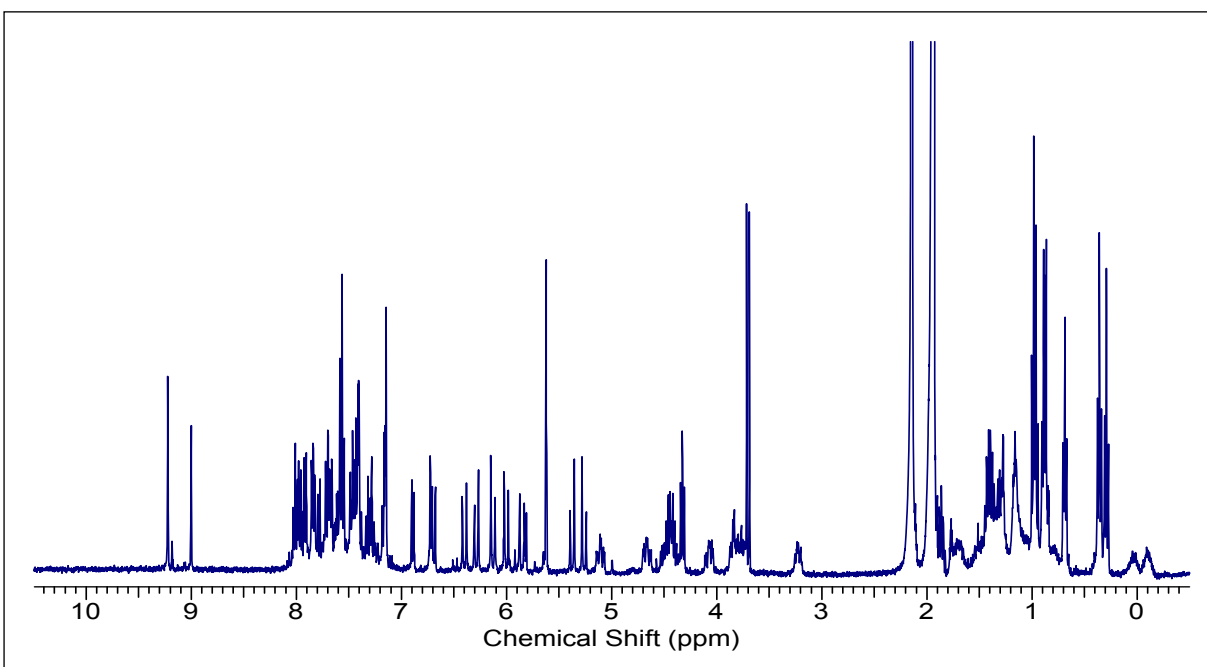

**Figure S1.**  $^1\text{H}$  NMR spectrum of isolated impurities from column chromatography of as-synthesized  $[\text{Ni}(\text{bC}^{\text{N}}\text{bC})\text{Cl}]\text{OTf}$  wherein  $\text{NiCl}_2(\text{DME})$  was slowly added to the silver carbene proligand species.

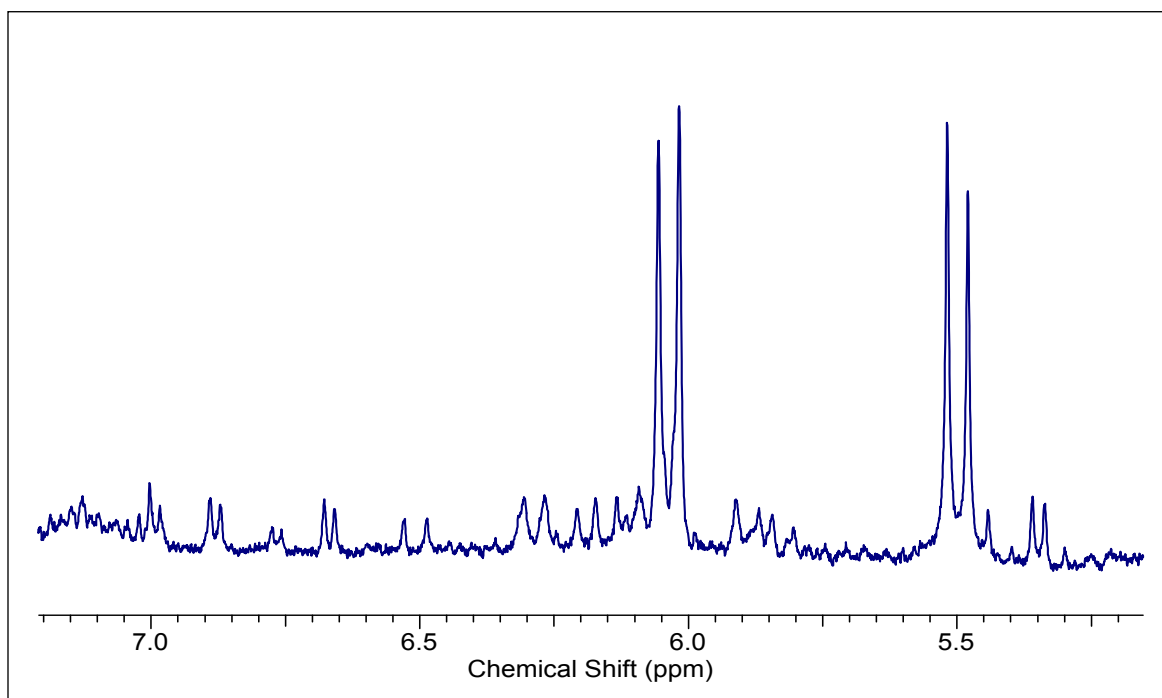

**Figure S2.**  $^1\text{H}$  NMR spectrum from 5.0 to 7.5 ppm of as-synthesized  $[\text{Pt}(\text{bC}^{\text{N}}\text{bC})\text{Br}]\text{OTf}$  prepared from  $\text{PtBr}_2$  before purification by column chromatography.

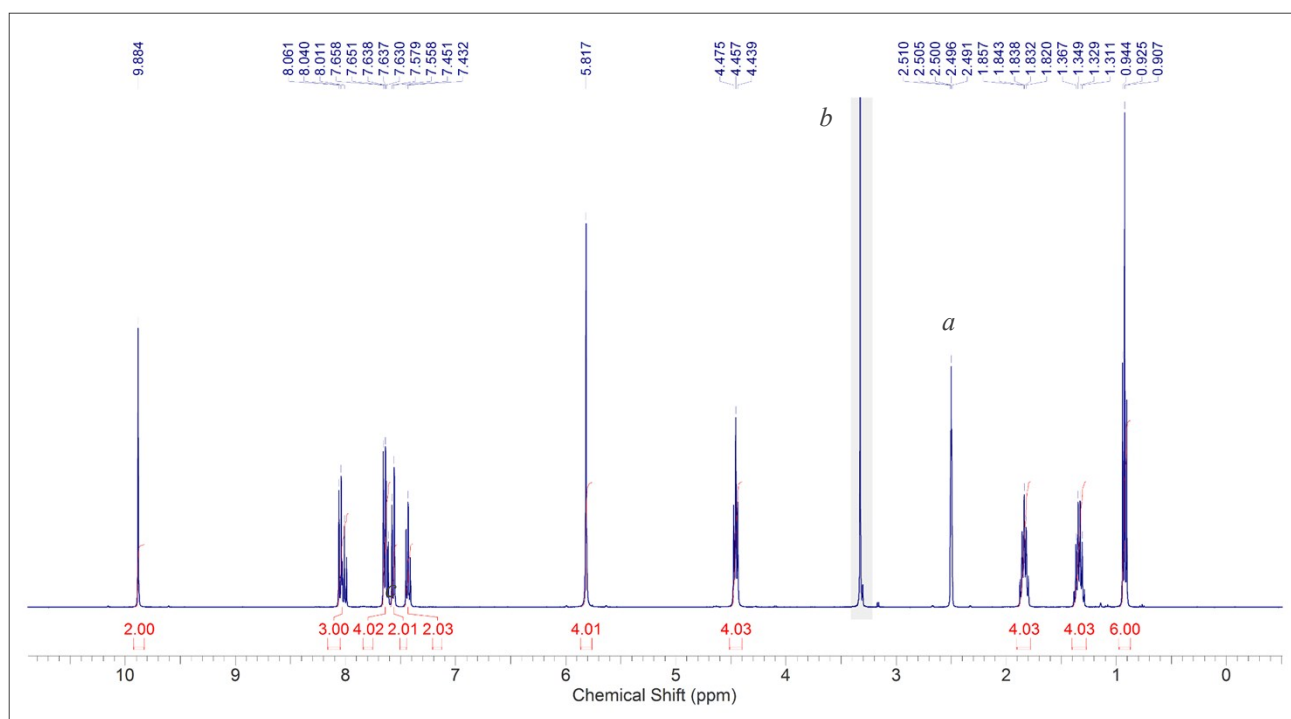

Fi

Figure S3.  $^1\text{H}$  NMR spectrum of  $\text{bC}^{\text{N}}\text{bC} \cdot 2\text{HBr}$  in  $(\text{CD}_3)_2\text{SO}$ . Residual solvent<sup>a</sup> and water<sup>b</sup> indicated.

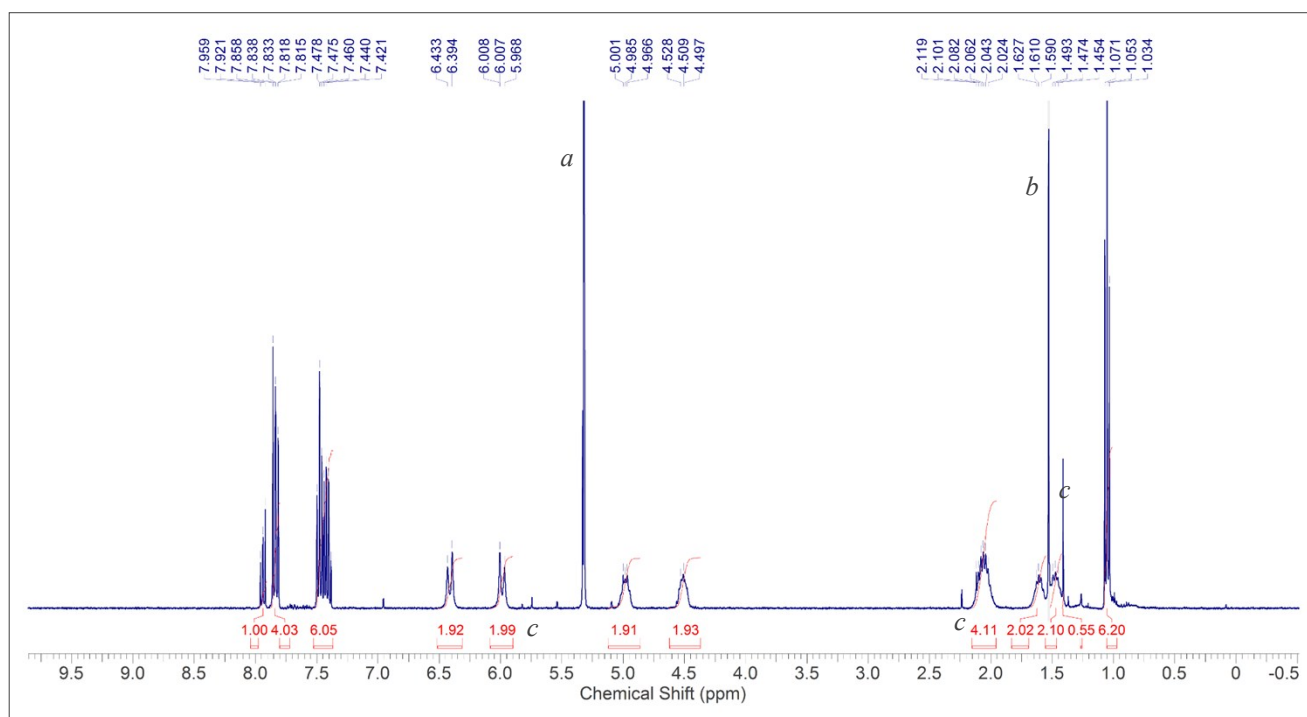

Figure S4.  $^1\text{H}$  NMR spectrum of  $[\text{Ni}(\text{bC}^{\text{N}}\text{bC})\text{Cl}]\text{OTf}$  in  $\text{CD}_2\text{Cl}_2$ . Residual solvent<sup>a</sup>, water<sup>b</sup>, and BHT<sup>c</sup> indicated.

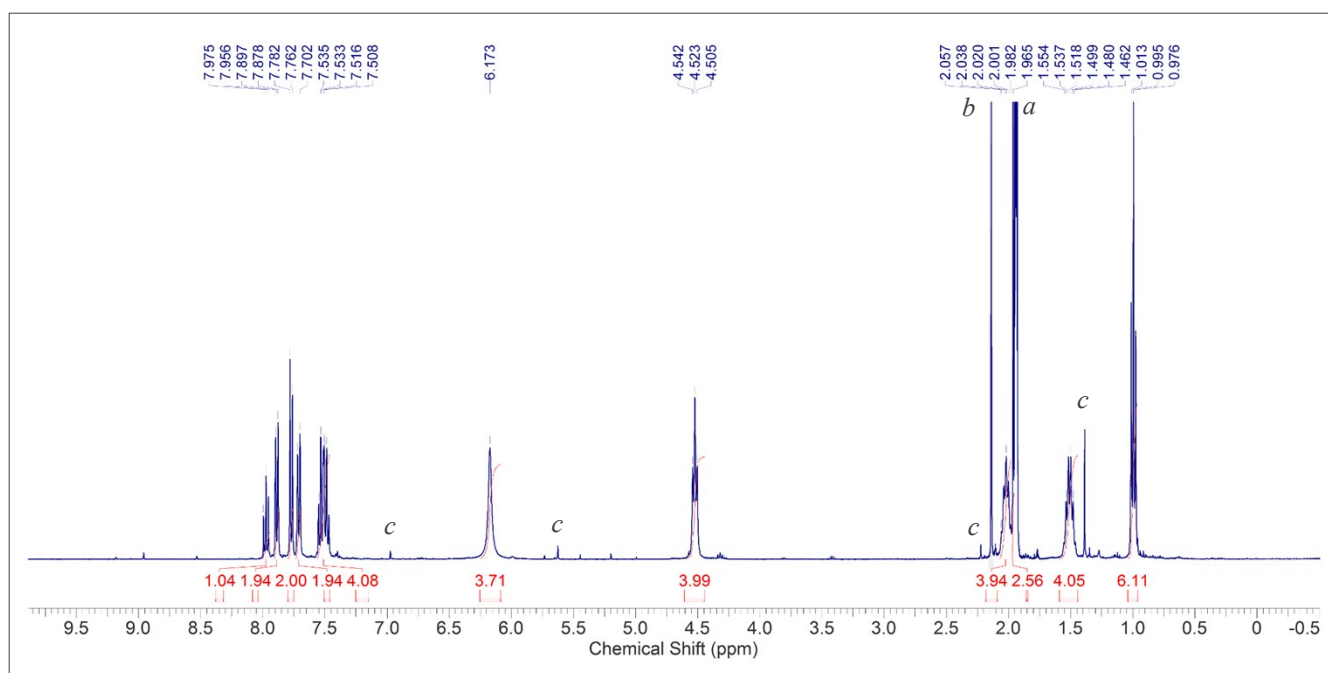

**Figure S5.**  $^1\text{H}$  NMR spectrum of  $[\text{Ni}(\text{bC}^{\wedge}\text{N}^{\wedge}\text{bC})(\text{CH}_3\text{CN})](\text{OTf})_2$  in  $\text{CD}_3\text{CN}$ . Residual solvent<sup>a</sup>, water<sup>b</sup>, and BHT<sup>c</sup> indicated.

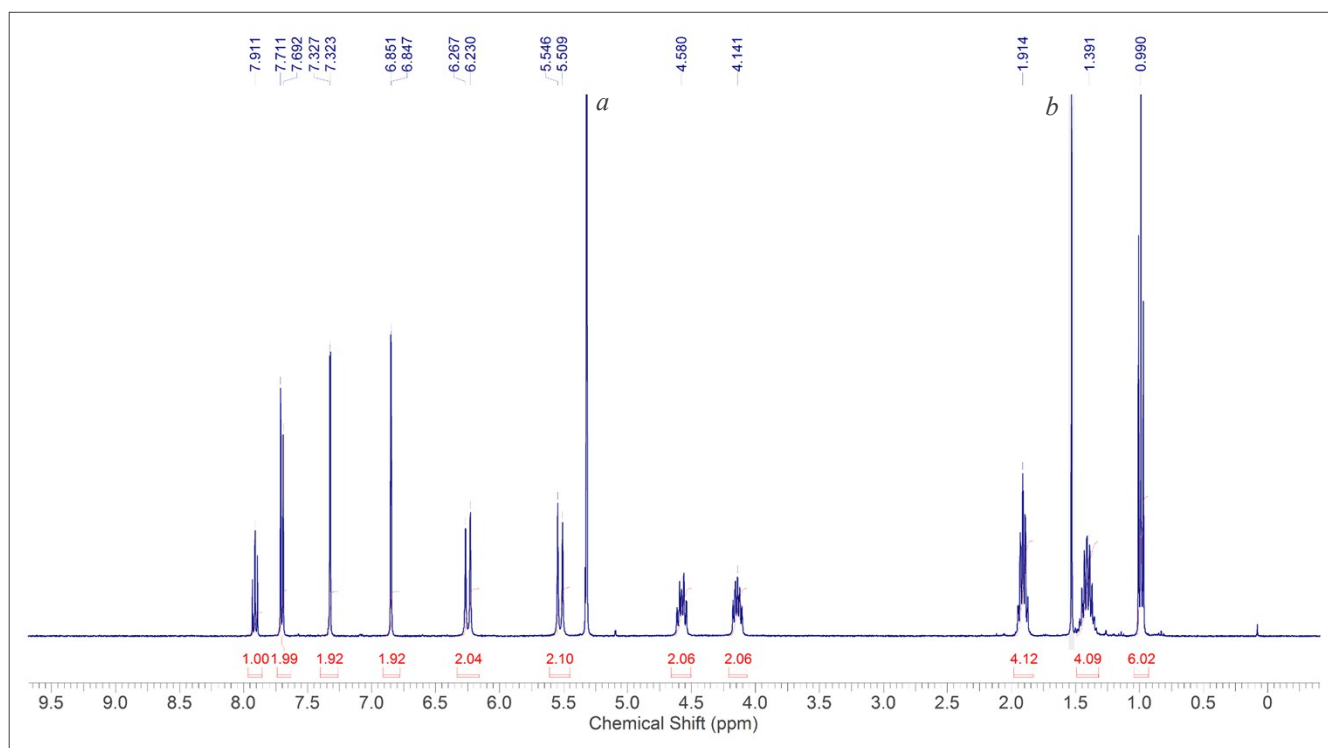

**Figure S6.**  $^1\text{H}$  NMR spectrum of  $[\text{Ni}(\text{C}^{\wedge}\text{N}^{\wedge}\text{C})\text{Cl}]\text{OTf}$  in  $\text{CD}_2\text{Cl}_2$ . Residual solvent<sup>a</sup> and water<sup>b</sup> indicated.

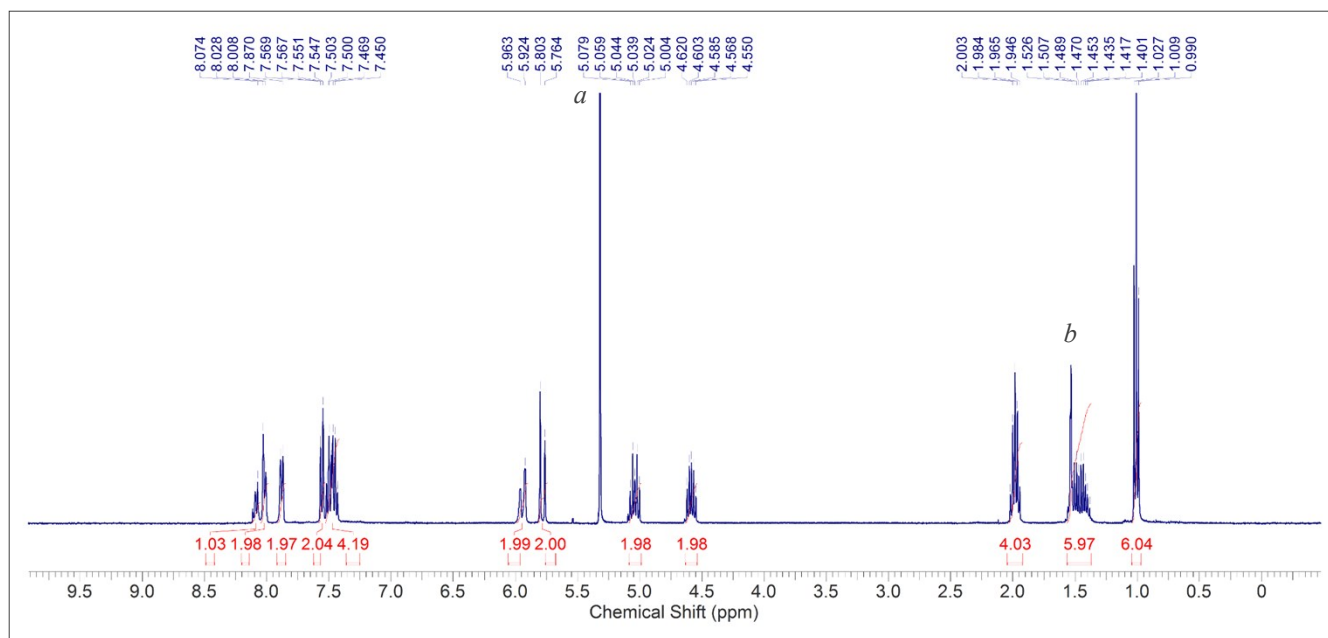

**Figure S7.**  $^1\text{H}$  NMR spectrum of  $[\text{Pd}(\text{bC}^{\wedge}\text{N}^{\wedge}\text{bC})\text{Cl}]\text{OTf}$  in  $\text{CD}_2\text{Cl}_2$ . Residual solvent<sup>a</sup> and water<sup>b</sup> indicated.

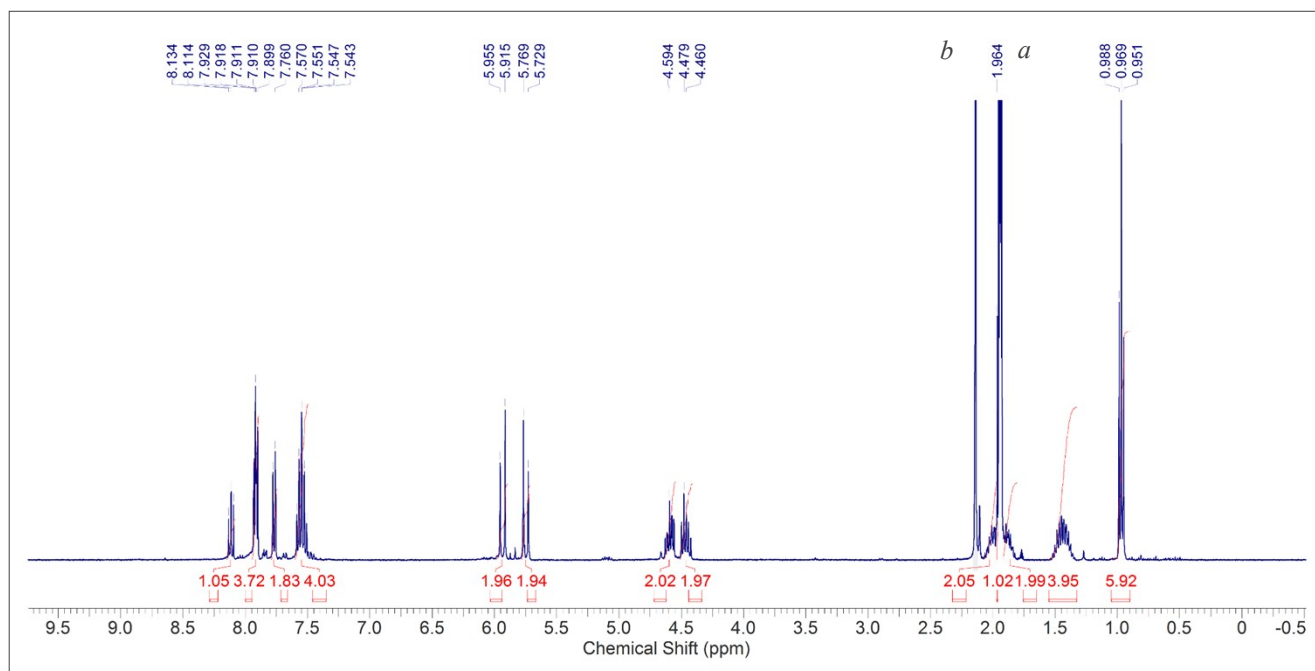

**Figure S8.**  $^1\text{H}$  NMR spectrum of  $[\text{Pd}(\text{bC}^{\wedge}\text{N}^{\wedge}\text{bC})(\text{CH}_3\text{CN})](\text{OTf})_2$  in  $\text{CD}_3\text{CN}$ . Residual solvent<sup>a</sup> and water<sup>b</sup> indicated.

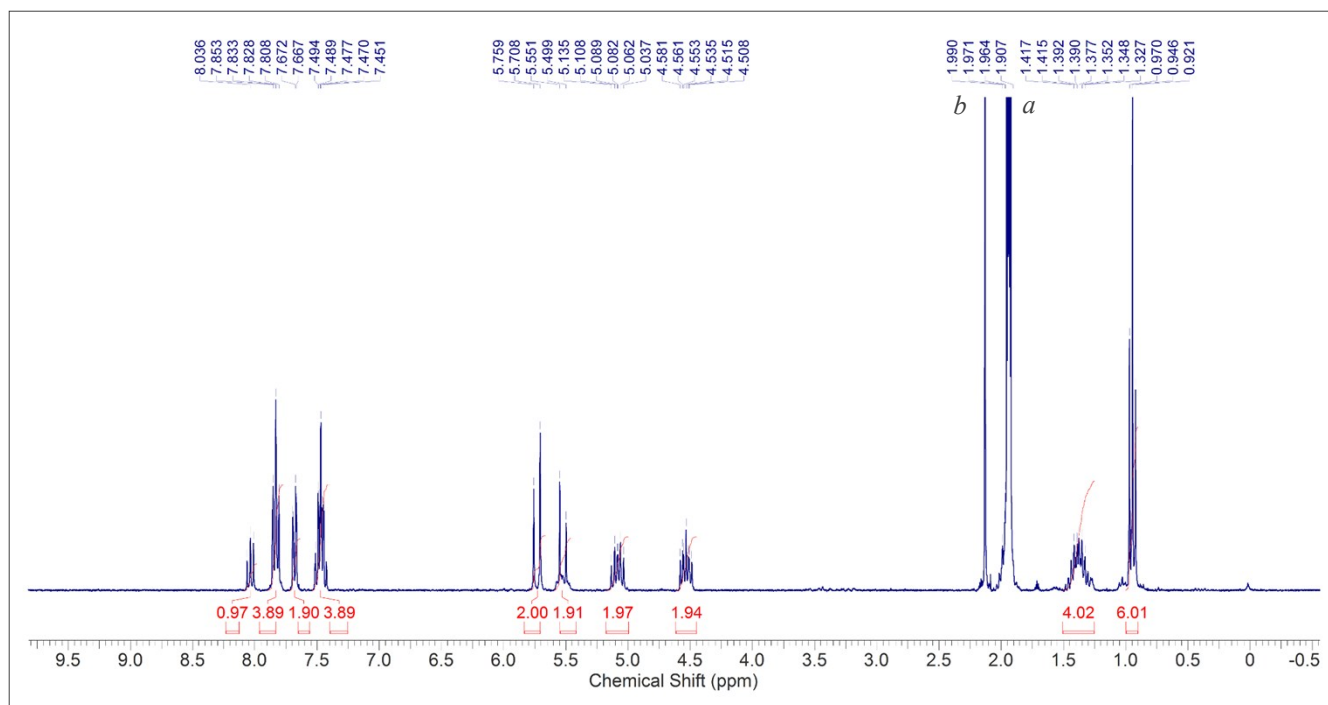

**Figure S9.**  $^1\text{H}$  NMR spectrum of  $[\text{Pt}(\text{bC}^{\wedge}\text{N}^{\wedge}\text{bC})\text{Br}]\text{OTf}$  in  $\text{CD}_3\text{CN}$ . Residual solvent<sup>a</sup> and water<sup>b</sup> indicated.

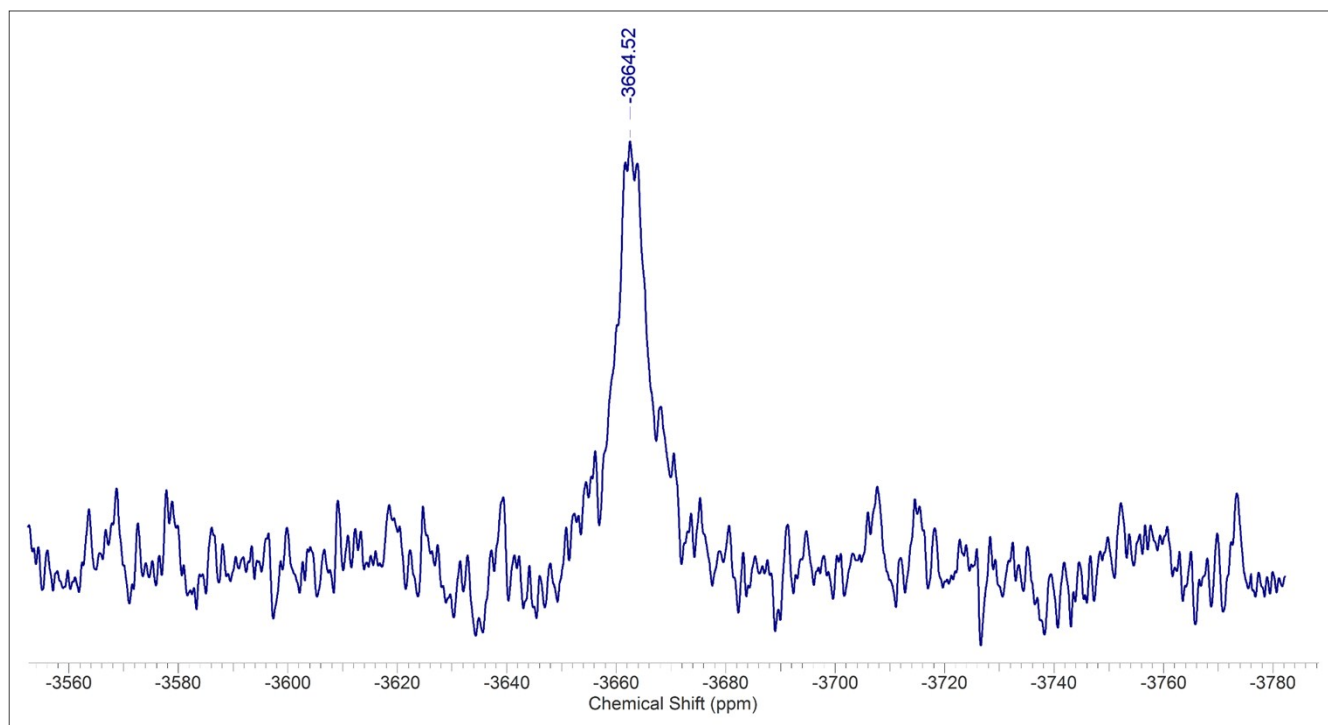

**Figure S10.**  $^{195}\text{Pt}$  NMR spectrum of  $[\text{Pt}(\text{bC}^{\wedge}\text{N}^{\wedge}\text{bC})\text{Br}]\text{OTf}$  in  $\text{CD}_3\text{CN}$ .

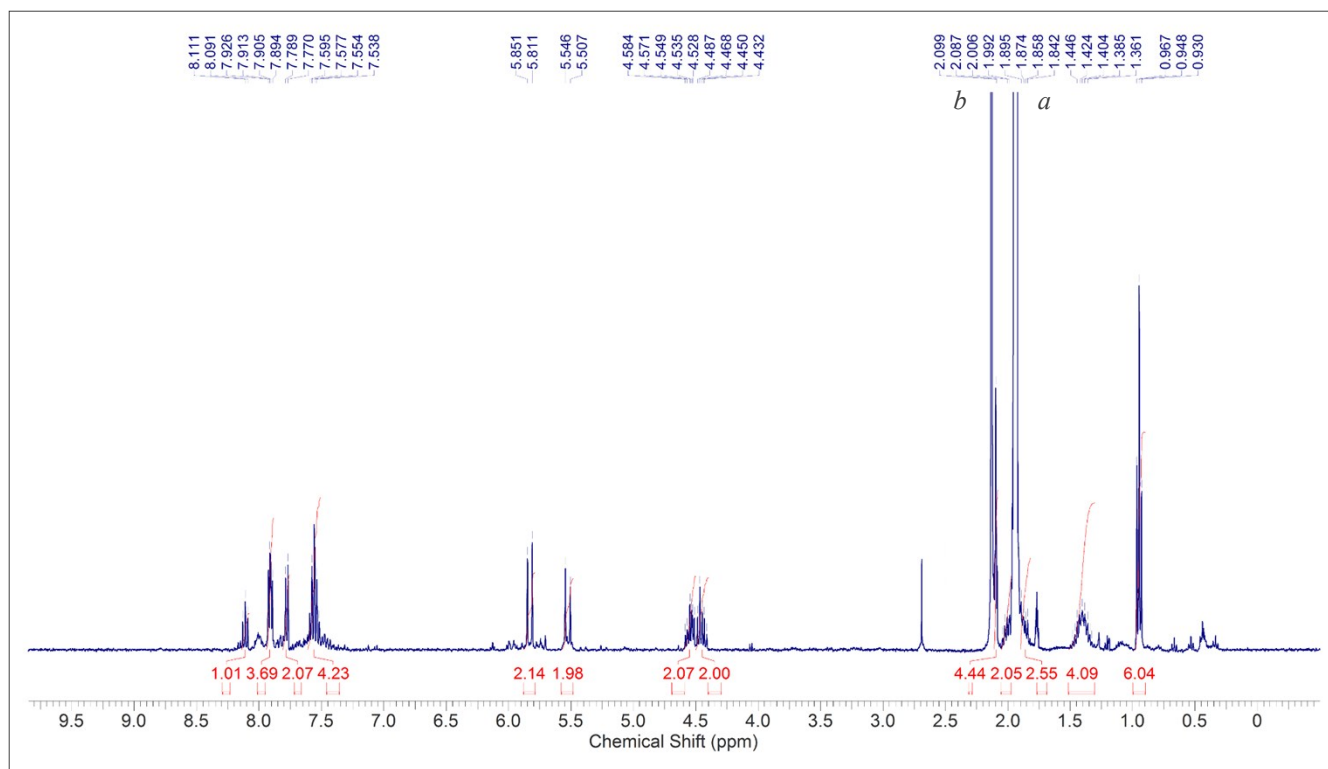

**Figure S11.**  $^1\text{H}$  NMR spectrum of  $[\text{Pt}(\text{bC}^{\wedge}\text{N}^{\wedge}\text{bC})(\text{CH}_3\text{CN})](\text{OTf})_2$  in  $\text{CD}_3\text{CN}$ . Residual solvent<sup>*a*</sup> and water<sup>*b*</sup> indicated.

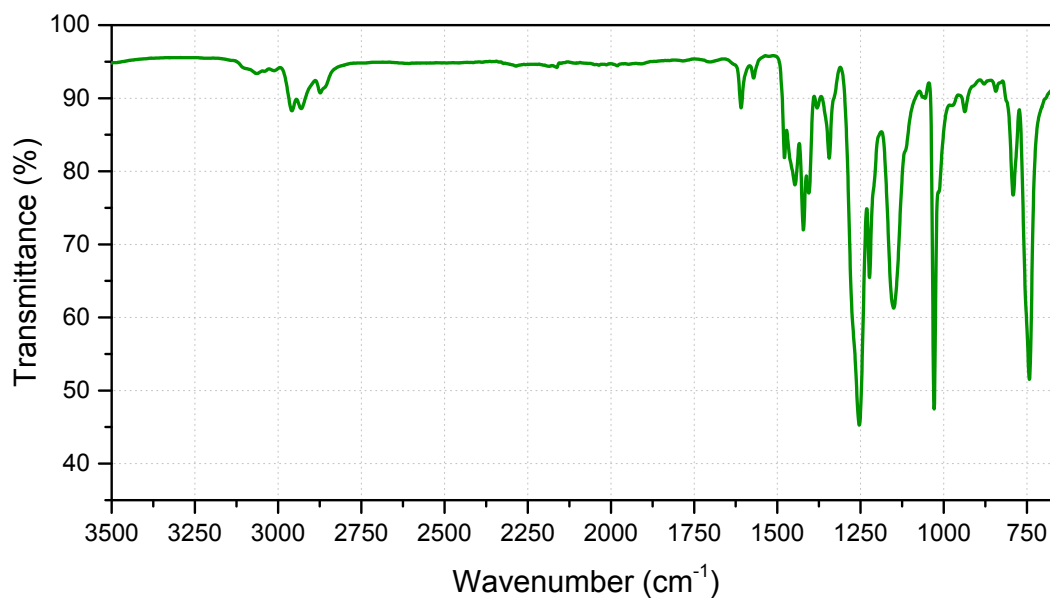

**Figure S12.** ATR-FTIR spectrum of  $[\text{Ni}(\text{bC}^{\wedge}\text{N}^{\wedge}\text{bC})\text{Cl}]\text{OTf}$ .

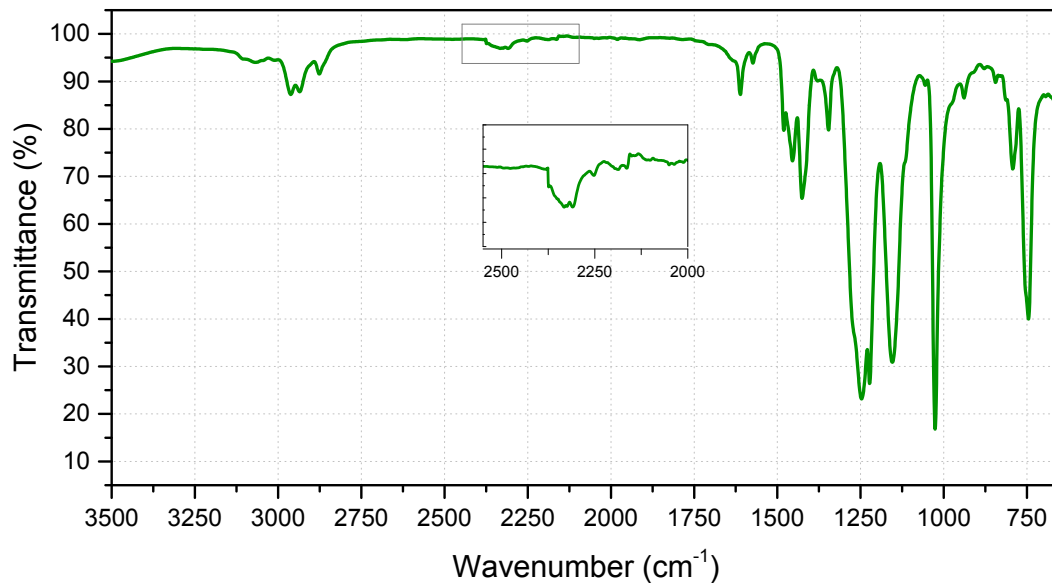

**Figure S13.** ATR-FTIR spectrum of  $[\text{Ni}(\text{bC}^{\wedge}\text{N}^{\wedge}\text{bC})(\text{CH}_3\text{CN})](\text{OTf})_2$ .

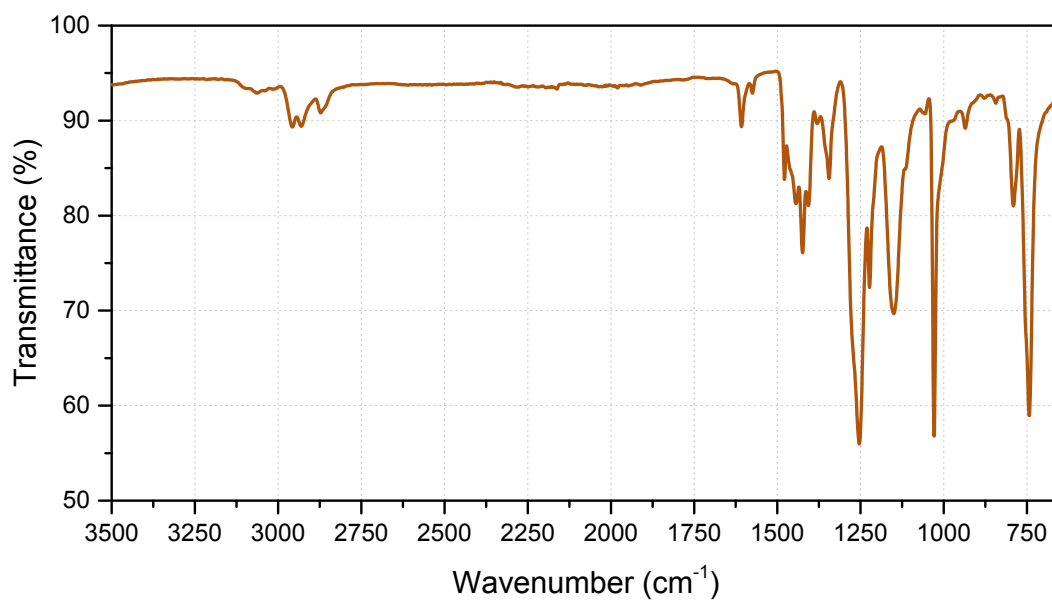

**Figure S14.** ATR-FTIR spectrum of  $[\text{Pd}(\text{bC}^{\wedge}\text{N}^{\wedge}\text{bC})\text{Cl}]\text{OTf}$ .



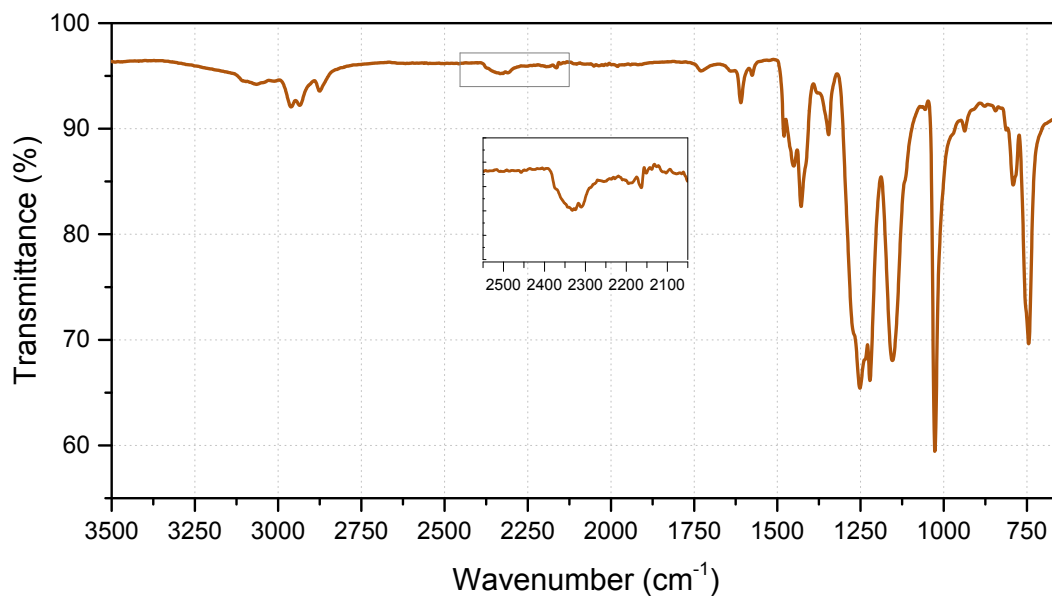

**Figure S15.** ATR-FTIR spectrum of [Pd(bC<sup>N</sup>bC)(CH<sub>3</sub>CN)](OTf)<sub>2</sub>.

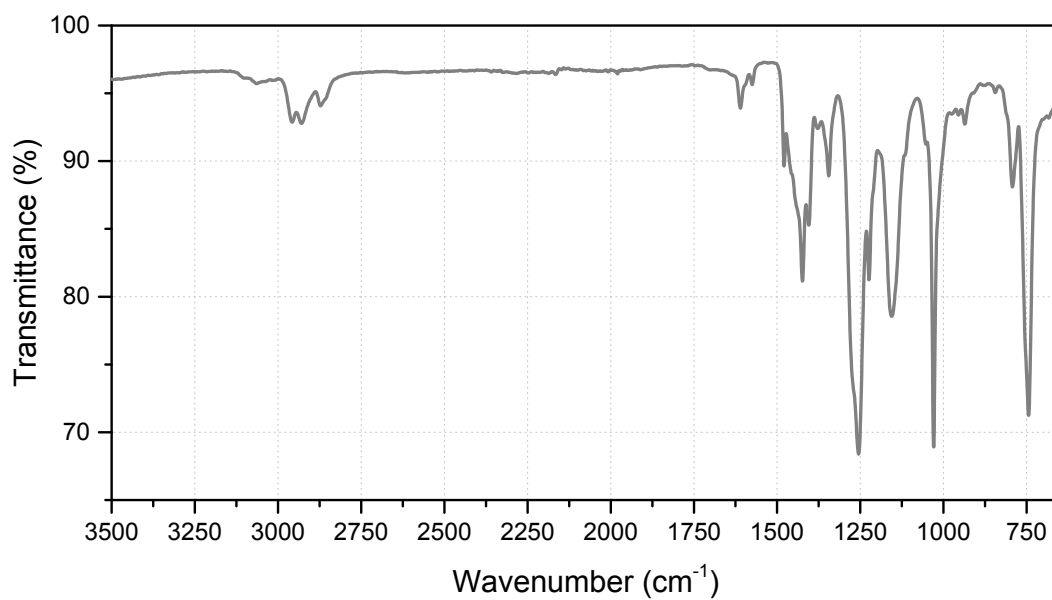

**Figure S16.** ATR-FTIR spectrum of [Pt(bC<sup>N</sup>bC)Br]OTf.

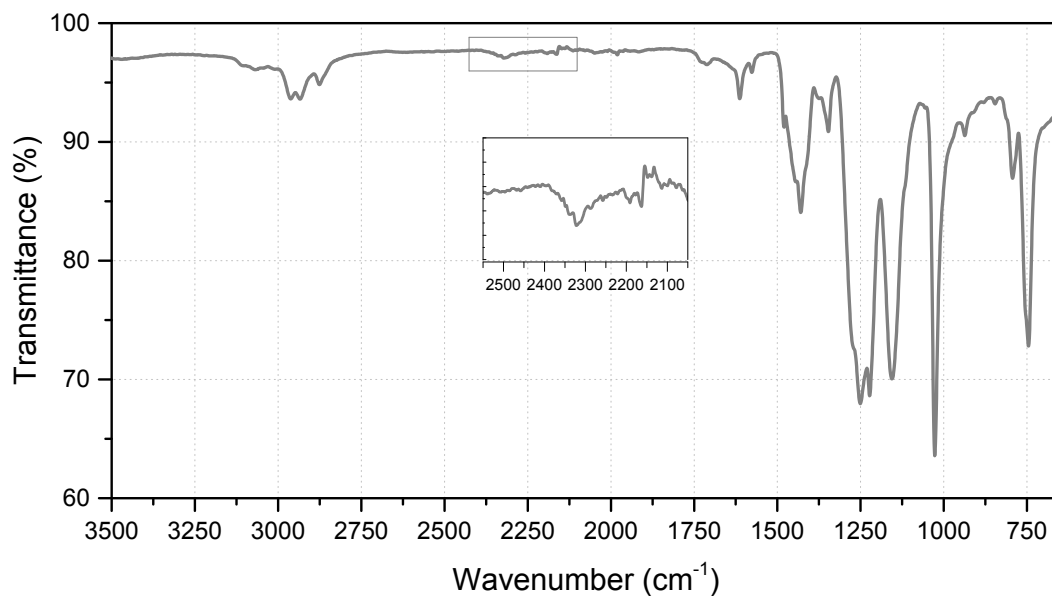

**Figure S17.** ATR-FTIR spectrum of  $[\text{Pt}(\text{bC}^{\wedge}\text{N}^{\wedge}\text{bC})(\text{CH}_3\text{CN})](\text{OTf})_2$ .

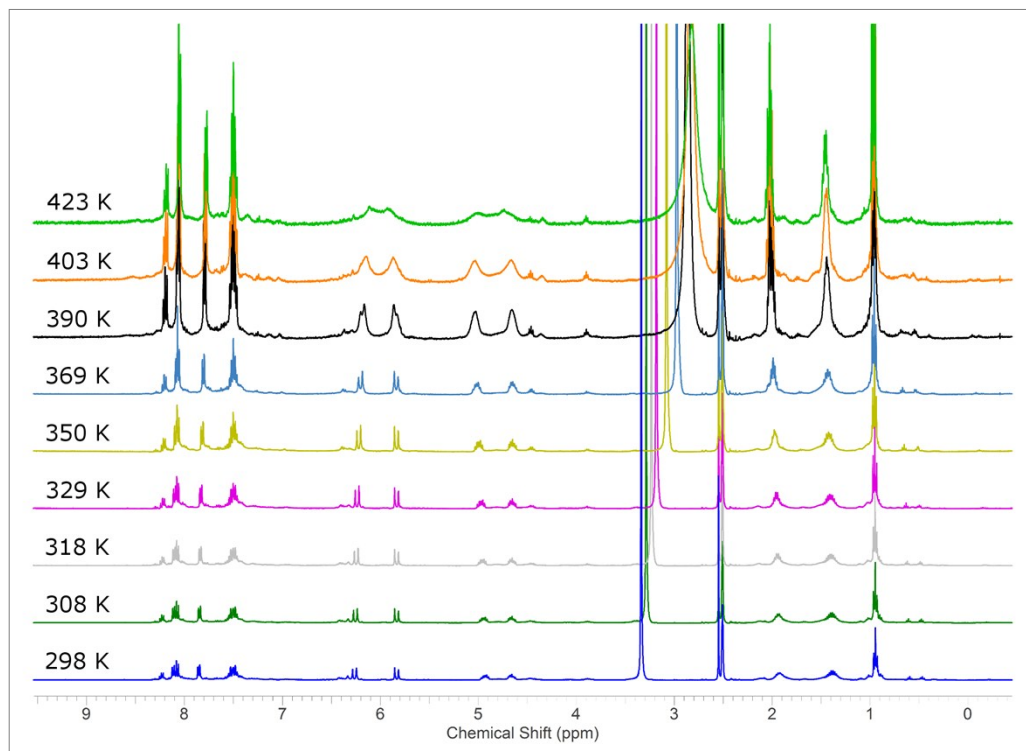

**Figure S18.** Variable temperature  $^1\text{H}$  NMR spectra of  $[\text{Pd}(\text{bC}^{\wedge}\text{N}^{\wedge}\text{bC})\text{Cl}]\text{BF}_4$  in  $(\text{CD}_3)_2\text{SO}$ .

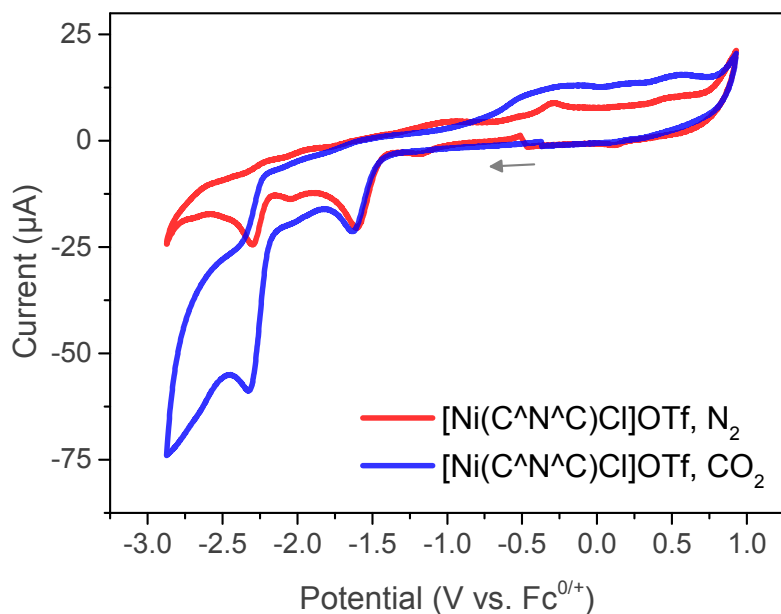

**Figure S19.** Overlaid cyclic voltammograms of [Ni(C<sup>N</sup>C)Cl]OTf taken at a scan rate of 100 mV/s under N<sub>2</sub> and CO<sub>2</sub>.

### DFT Sample Input Code

A typical example of the input used for geometry optimization of reduced species in Gaussian is given below for input files used in sequence:

```
%chk=Ni2-bC^N^bC-Cl-cpcm.chk
# opt freq=noraman wb97xd/genecp scrf=(cpcm,solvent=acetonitrile) nosymm
pop=npa

Ni(bC^N^bC)Cl Geometry Optimization

1 1
N      -1.03464400    2.91625900    1.19969900
N       0.44807000    2.69941600   -0.36773900
N       1.03464400   -2.91625900    1.19969900
N      -0.44807000   -2.69941600   -0.36773900
N       0.00000000    0.00000000   -1.42008700
C       1.99316300   -2.65215200    2.26474500
C      -1.99316300    2.65215200    2.26474500
C       0.82651300   -4.19008800    0.66992000
```

|    |             |             |             |
|----|-------------|-------------|-------------|
| C  | 0.25476500  | -2.01745500 | 0.57290400  |
| C  | -0.25476500 | 2.01745500  | 0.57290400  |
| C  | 0.12565200  | 4.05485000  | -0.34590100 |
| C  | 1.35956100  | 2.02948000  | -1.27967100 |
| C  | -1.35956100 | -2.02948000 | -1.27967100 |
| C  | 0.00000000  | 0.00000000  | -4.19754500 |
| C  | -0.66657200 | -0.99706400 | -3.48827700 |
| C  | 0.66657200  | 0.99706400  | -3.48827700 |
| C  | -0.64677200 | -0.96992500 | -2.09657700 |
| C  | 0.64677200  | 0.96992500  | -2.09657700 |
| H  | 2.96835500  | -3.05606100 | 1.97640500  |
| H  | 2.06479400  | -1.57783800 | 2.42586800  |
| H  | -2.96835500 | 3.05606100  | 1.97640500  |
| H  | -2.06479400 | 1.57783800  | 2.42586800  |
| H  | 1.79898700  | 2.77354100  | -1.94584700 |
| H  | 2.17288600  | 1.56732500  | -0.70890800 |
| H  | -1.79898700 | -2.77354100 | -1.94584700 |
| H  | -2.17288600 | -1.56732500 | -0.70890800 |
| H  | 0.00000000  | 0.00000000  | -5.28384900 |
| H  | -1.19558400 | -1.79166600 | -4.00567300 |
| H  | 1.19558400  | 1.79166600  | -4.00567300 |
| H  | -1.65440800 | 3.12302500  | 3.18985500  |
| H  | 1.65440800  | -3.12302500 | 3.18985500  |
| Ni | 0.00000000  | 0.00000000  | 0.66612400  |
| Cl | 0.00000000  | 0.00000000  | 2.95654800  |
| C  | -0.12565200 | -4.05485000 | -0.34590100 |
| C  | -0.56267900 | -5.15137100 | -1.09124600 |
| C  | 0.00000000  | -6.38630500 | -0.77707600 |
| C  | 1.39058800  | -5.42668600 | 0.98854200  |
| C  | 0.96100500  | -6.52238300 | 0.24437800  |
| C  | -0.82651300 | 4.19008800  | 0.66992000  |
| C  | -1.39058800 | 5.42668600  | 0.98854200  |
| C  | -0.96100500 | 6.52238300  | 0.24437800  |
| C  | 0.56267900  | 5.15137100  | -1.09124600 |
| C  | 0.00000000  | 6.38630500  | -0.77707600 |
| H  | -2.12726000 | 5.53452100  | 1.77933100  |
| H  | -1.37311700 | 7.50465600  | 0.45616500  |
| H  | 0.31166200  | 7.26688500  | -1.33135000 |
| H  | 1.30869900  | 5.06426000  | -1.87664900 |

```

H          2.12726000  -5.53452100   1.77933100
H          1.37311700  -7.50465600   0.45616500
H          -0.31166200  -7.26688500  -1.33135000
H          -1.30869900  -5.06426000  -1.87664900

H C N Cl 0
D95(d)
****
@./basis/sdd-ni.gbs

///// (end of file) /////
%oldchk=Ni2-bC^N^bC-Cl-cpcm.chk
%chk=Ni1-bC^N^bC-Cl-cpcm.chk
# opt freq=noraman wb97xd/genecp scrf=(cpcm,solvent=acetonitrile) pop=npa
geom=check guess=read

Ni(bC^N^bC)Cl, 1e reduced

0 2

H C N Cl 0
D95(d)
****
@./basis/sdd-ni.gbs

///// (end of file) /////

```

A typical example of the input used for modelling the approach of CO<sub>2</sub> to a reduced complex is given below:

```

%chk=Ni1-bC^N^bC-Cl-cpcm-scan.chk
# opt=modredundant wb97xd/genecp scrf=(cpcm,solvent=acetonitrile) nosymm

```

CO<sub>2</sub> Scan from 3.25A to 1.75A - 0.25A/6steps

0 2

|    |             |             |             |
|----|-------------|-------------|-------------|
| N  | -1.08874500 | 2.79501100  | 1.11373100  |
| N  | 0.58155800  | 2.62139300  | -0.26013100 |
| N  | 1.08874500  | -2.79501100 | 1.11373100  |
| N  | -0.58155800 | -2.62139300 | -0.26013100 |
| N  | 0.00000000  | 0.00000000  | -1.24639500 |
| C  | 2.19001500  | -2.48036800 | 2.00859800  |
| C  | -2.19001500 | 2.48036800  | 2.00859800  |
| C  | 0.84565400  | -4.07556000 | 0.62634100  |
| C  | 0.16403368  | -1.91722079 | 0.56473809  |
| C  | -0.19915124 | 1.91398907  | 0.56672417  |
| C  | 0.22715300  | 3.96444600  | -0.27029000 |
| C  | 1.50398500  | 1.92412400  | -1.15969000 |
| C  | -1.50398500 | -1.92412400 | -1.15969000 |
| C  | 0.00000000  | 0.00000000  | -4.10351000 |
| C  | -0.74251200 | -0.95259400 | -3.35427000 |
| C  | 0.74251200  | 0.95259400  | -3.35427000 |
| C  | -0.73624600 | -0.92732400 | -1.98001600 |
| C  | 0.73624600  | 0.92732400  | -1.98001600 |
| H  | 3.13063700  | -2.81229700 | 1.55883000  |
| H  | 2.21512600  | -1.40371100 | 2.16875000  |
| H  | -3.13063700 | 2.81229700  | 1.55883000  |
| H  | -2.21512600 | 1.40371100  | 2.16875000  |
| H  | 2.00224300  | 2.65470300  | -1.79807400 |
| H  | 2.26437200  | 1.42858600  | -0.54165800 |
| H  | -2.00224300 | -2.65470300 | -1.79807400 |
| H  | -2.26437200 | -1.42858600 | -0.54165800 |
| H  | 0.00000000  | 0.00000000  | -5.18847300 |
| H  | -1.33299300 | -1.71501900 | -3.85784300 |
| H  | 1.33299300  | 1.71501900  | -3.85784300 |
| H  | -2.05021400 | 2.98281300  | 2.97013100  |
| H  | 2.05021400  | -2.98281300 | 2.97013100  |
| Cl | 0.00000000  | 0.00000000  | 2.89398300  |
| C  | -0.22715300 | -3.96444600 | -0.27029000 |
| C  | -0.72628700 | -5.07551800 | -0.95235700 |
| C  | -0.10704000 | -6.30072300 | -0.70126300 |
| C  | 1.46584900  | -5.29939500 | 0.88198000  |

|    |             |             |             |
|----|-------------|-------------|-------------|
| C  | 0.96961100  | -6.41183700 | 0.20152900  |
| C  | -0.84565400 | 4.07556000  | 0.62634100  |
| C  | -1.46584900 | 5.29939500  | 0.88198000  |
| C  | -0.96961100 | 6.41183700  | 0.20152900  |
| C  | 0.72628700  | 5.07551800  | -0.95235700 |
| C  | 0.10704000  | 6.30072300  | -0.70126300 |
| H  | -2.29476200 | 5.38538700  | 1.57868800  |
| H  | -1.42335700 | 7.38441800  | 0.36998800  |
| H  | 0.46472600  | 7.18973100  | -1.21303400 |
| H  | 1.55495900  | 4.99967200  | -1.65025800 |
| H  | 2.29476200  | -5.38538700 | 1.57868800  |
| H  | 1.42335700  | -7.38441800 | 0.36998800  |
| H  | -0.46472600 | -7.18973100 | -1.21303400 |
| H  | -1.55495900 | -4.99967200 | -1.65025800 |
| Ni | 0.00000000  | 0.00000000  | 0.65957500  |
| C  | 3.23818057  | 0.26589786  | 0.73693748  |
| O  | 3.17922230  | 0.88653372  | 1.76228379  |
| O  | 3.32990022  | -0.35204785 | -0.28762613 |

B 51 52 S 6 -0.250000

H C N O Cl 0

D95 (d)

\*\*\*\*

@./basis/sdd-ni.gbs

///// (end of file) /////

## DFT Optimized Geometries

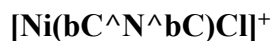

---

|    |              |              |              |
|----|--------------|--------------|--------------|
| N  | -1.116328316 | 2.782136416  | 1.097091934  |
| N  | 0.533257983  | 2.618045076  | -0.299824827 |
| N  | 1.116328332  | -2.782136432 | 1.097091940  |
| N  | -0.533257962 | -2.618045060 | -0.299824817 |
| N  | 0.000000027  | 0.000000005  | -1.341315717 |
| C  | 2.211314654  | -2.463909968 | 2.000990510  |
| C  | -2.211314633 | 2.463909931  | 2.000990505  |
| C  | 0.852232191  | -4.072907600 | 0.643761084  |
| C  | 0.272276687  | -1.904607769 | 0.521362270  |
| C  | -0.272276651 | 1.904607769  | 0.521362264  |
| C  | 0.208327385  | 3.970668645  | -0.266104328 |
| C  | 1.463248665  | 1.948882289  | -1.198929556 |
| C  | -1.463248639 | -1.948882257 | -1.198929540 |
| C  | 0.000000010  | 0.000000008  | -4.117756668 |
| C  | -0.743554165 | -0.942024511 | -3.409676492 |
| C  | 0.743554186  | 0.942024527  | -3.409676498 |
| C  | -0.715833723 | -0.919327490 | -2.019042307 |
| C  | 0.715833760  | 0.919327506  | -2.019042313 |
| H  | 3.148021230  | -2.834841052 | 1.575684469  |
| H  | 2.262822645  | -1.383854350 | 2.126262402  |
| H  | -3.148021214 | 2.834840994  | 1.575684463  |
| H  | -2.262822603 | 1.383854313  | 2.126262397  |
| H  | 1.924101474  | 2.686878463  | -1.854536896 |
| H  | 2.257851189  | 1.469657271  | -0.618574305 |
| H  | -1.924101463 | -2.686878431 | -1.854536881 |
| H  | -2.257851152 | -1.469657229 | -0.618574289 |
| H  | 0.000000002  | 0.000000010  | -5.203347998 |
| H  | -1.331388347 | -1.694067838 | -3.925051349 |
| H  | 1.331388357  | 1.694067859  | -3.925051359 |
| H  | -2.041085921 | 2.932350464  | 2.974104465  |
| H  | 2.041085932  | -2.932350501 | 2.974104470  |
| Ni | 0.000000043  | 0.000000005  | 0.598585529  |
| Cl | 0.000000027  | 0.000000006  | 2.801600852  |
| C  | -0.208327393 | -3.970668639 | -0.266104318 |
| C  | -0.724743517 | -5.090978442 | -0.919311255 |
| C  | -0.130387601 | -6.317464475 | -0.624118056 |
| C  | 1.448384446  | -5.299082227 | 0.942552720  |
| C  | 0.936742475  | -6.420686636 | 0.291516619  |
| C  | -0.852232202 | 4.072907589  | 0.643761073  |
| C  | -1.448384478 | 5.299082227  | 0.942552709  |
| C  | -0.936742533 | 6.420686636  | 0.291516607  |
| C  | 0.724743486  | 5.090978458  | -0.919311265 |
| C  | 0.130387544  | 6.317464475  | -0.624118066 |
| H  | -2.268457684 | 5.379294914  | 1.649914347  |
| H  | -1.370173880 | 7.395998565  | 0.492984381  |
| H  | 0.500835228  | 7.215082812  | -1.110691848 |
| H  | 1.546610476  | 5.023638394  | -1.625754045 |
| H  | 2.268457647  | -5.379294967 | 1.649914357  |
| H  | 1.370173806  | -7.395998565 | 0.492984394  |
| H  | -0.500835305 | -7.215082812 | -1.110691832 |
| H  | -1.546610507 | -5.023638362 | -1.625754029 |

---



[Ni(bC<sup>N</sup>bC)Cl] (1e<sup>-</sup> reduced)

---

|    |              |              |              |
|----|--------------|--------------|--------------|
| N  | -1.088744692 | 2.795010717  | 1.113730775  |
| N  | 0.581557780  | 2.621393154  | -0.260131360 |
| N  | 1.088744692  | -2.795010717 | 1.113730775  |
| N  | -0.581557780 | -2.621393154 | -0.260131359 |
| N  | 0.000000002  | 0.000000000  | -1.246395448 |
| C  | 2.190014798  | -2.480367793 | 2.008597968  |
| C  | -2.190014798 | 2.480367793  | 2.008597962  |
| C  | 0.845654079  | -4.075560688 | 0.626341071  |
| C  | 0.221354624  | -1.911524545 | 0.566223070  |
| C  | -0.221354624 | 1.911524539  | 0.566223070  |
| C  | 0.227153261  | 3.964446341  | -0.270290272 |
| C  | 1.503985597  | 1.924124255  | -1.159689867 |
| C  | -1.503985597 | -1.924124255 | -1.159689862 |
| C  | -0.000000001 | 0.000000000  | -4.103510137 |
| C  | -0.742511686 | -0.952594011 | -3.354270031 |
| C  | 0.742511686  | 0.952594011  | -3.354270031 |
| C  | -0.736246286 | -0.927323628 | -1.980015903 |
| C  | 0.736246286  | 0.927323628  | -1.980015903 |
| H  | 3.130636968  | -2.812297631 | 1.558829771  |
| H  | 2.215126534  | -1.403710991 | 2.168749763  |
| H  | -3.130636974 | 2.812297636  | 1.558829771  |
| H  | -2.215126540 | 1.403710991  | 2.168749758  |
| H  | 2.002243628  | 2.654703174  | -1.798074515 |
| H  | 2.264371923  | 1.428585936  | -0.541657783 |
| H  | -2.002243628 | -2.654703174 | -1.798074515 |
| H  | -2.264371923 | -1.428585936 | -0.541657783 |
| H  | -0.000000002 | 0.000000000  | -5.188473524 |
| H  | -1.332992918 | -1.715019172 | -3.857843637 |
| H  | 1.332992918  | 1.715019177  | -3.857843642 |
| H  | -2.050213668 | 2.982813389  | 2.970131614  |
| H  | 2.050213668  | -2.982813389 | 2.970131614  |
| Ni | 0.000000002  | 0.000000000  | 0.659575524  |
| Cl | 0.000000010  | 0.000000001  | 2.893983553  |
| C  | -0.227153261 | -3.964446341 | -0.270290272 |
| C  | -0.726286715 | -5.075518317 | -0.952357268 |
| C  | -0.107039687 | -6.300723265 | -0.701262997 |
| C  | 1.465849270  | -5.299395817 | 0.881979753  |
| C  | 0.969611405  | -6.411837945 | 0.201528822  |
| C  | -0.845654079 | 4.075560688  | 0.626341071  |
| C  | -1.465849270 | 5.299395817  | 0.881979753  |
| C  | -0.969611405 | 6.411837945  | 0.201528824  |
| C  | 0.726286715  | 5.075518317  | -0.952357268 |
| C  | 0.107039687  | 6.300723318  | -0.701262992 |
| H  | -2.294761699 | 5.385387173  | 1.578687766  |
| H  | -1.423357580 | 7.384418897  | 0.369988344  |
| H  | 0.464725900  | 7.189731835  | -1.213033870 |
| H  | 1.554959300  | 4.999671951  | -1.650258243 |
| H  | 2.294761699  | -5.385387173 | 1.578687766  |
| H  | 1.423357580  | -7.384418897 | 0.369988342  |
| H  | -0.464725900 | -7.189731835 | -1.213033876 |
| H  | -1.554959300 | -4.999671951 | -1.650258243 |

---

[Pd(bC<sup>N</sup>bC)Cl]<sup>+</sup>

---

|    |              |              |              |
|----|--------------|--------------|--------------|
| N  | 3.007707347  | -1.171964144 | 0.772147051  |
| N  | 2.626548918  | 0.328401067  | -0.748592382 |
| N  | -3.008050614 | -1.171982030 | -0.771767928 |
| N  | -2.626363838 | 0.328620951  | 0.748592340  |
| N  | 0.000082598  | 1.364571565  | -0.000337259 |
| C  | -2.835020851 | -2.168310070 | -1.818680508 |
| C  | 2.834327353  | -2.168063235 | 1.819219157  |
| C  | -4.244491629 | -0.622161195 | -0.438886185 |
| C  | -2.031554037 | -0.589523771 | -0.049867775 |
| C  | 2.031464166  | -0.589606349 | 0.049820914  |
| C  | 4.001683771  | 0.352571334  | -0.536155695 |
| C  | 1.852467454  | 1.226960752  | -1.594246340 |
| C  | -1.852021881 | 1.227224378  | 1.593945031  |
| C  | 0.000278905  | 4.139271782  | -0.000321671 |
| C  | -0.908009130 | 3.431251356  | 0.783744918  |
| C  | 0.908513044  | 3.431136101  | -0.784343682 |
| C  | -0.882837612 | 2.040311460  | 0.762049471  |
| C  | 0.883159040  | 2.040200782  | -0.762641451 |
| H  | -3.250108792 | -1.783655885 | -2.754438126 |
| H  | -1.771882352 | -2.370238435 | -1.939106660 |
| H  | 3.249216499  | -1.783253345 | 2.755001451  |
| H  | 1.771143425  | -2.369876917 | 1.939426632  |
| H  | 2.535602235  | 1.890384168  | -2.123369501 |
| H  | 1.305247552  | 0.643048774  | -2.340629010 |
| H  | -2.534987977 | 1.890750067  | 2.123156529  |
| H  | -1.304677273 | 0.643352252  | 2.340268408  |
| H  | 0.000360069  | 5.224828869  | -0.000307318 |
| H  | -1.632626020 | 3.947016311  | 1.404810965  |
| H  | 1.633264764  | 3.946805233  | -1.405331824 |
| H  | 3.348970321  | -3.092202333 | 1.542896985  |
| H  | -3.349670136 | -3.092351095 | -1.542041739 |
| Pd | -0.000033466 | -0.710278606 | -0.000413138 |
| Cl | -0.000102863 | -3.040201788 | -0.000410807 |
| C  | -4.001556022 | 0.352849722  | 0.536536850  |
| C  | -5.035724326 | 1.110827000  | 1.088911404  |
| C  | -6.322399741 | 0.851100800  | 0.618775376  |
| C  | -5.531455281 | -0.886060556 | -0.911060852 |
| C  | -6.567086432 | -0.130435640 | -0.363712274 |
| C  | 4.244276328  | -0.622280869 | 0.439514204  |
| C  | 5.531087556  | -0.886168513 | 0.912113868  |
| C  | 6.566921117  | -0.130698300 | 0.364939241  |
| C  | 5.036057745  | 1.110396186  | -1.088355975 |
| C  | 6.322578338  | 0.850680384  | -0.617792377 |
| H  | 5.719007975  | -1.642377847 | 1.668483325  |
| H  | 7.584826523  | -0.300444645 | 0.703643353  |
| H  | 7.156980949  | 1.418594572  | -1.019021526 |
| H  | 4.859749406  | 1.868204984  | -1.845782865 |
| H  | -5.719642036 | -1.642397315 | -1.667236546 |
| H  | -7.585102595 | -0.300191290 | -0.702079613 |
| H  | -7.156652542 | 1.419125713  | 1.020158066  |
| H  | -4.859150001 | 1.868751301  | 1.846160386  |

---

[Pd(bC<sup>N</sup>bC)Cl] (1e<sup>-</sup> reduced)

---

|    |              |              |              |
|----|--------------|--------------|--------------|
| N  | -1.064783531 | 2.918097578  | 1.177700748  |
| N  | 0.505668656  | 2.697560583  | -0.305848723 |
| N  | 1.078849946  | -2.918305089 | 1.176041269  |
| N  | -0.496917344 | -2.698232379 | -0.301916546 |
| N  | 0.002285424  | -0.000613922 | -1.364905328 |
| C  | 2.123963688  | -2.629613537 | 2.144939343  |
| C  | -2.105735707 | 2.629536081  | 2.151097262  |
| C  | 0.845466766  | -4.188365884 | 0.656871937  |
| C  | 0.261527990  | -2.018866520 | 0.584620583  |
| C  | -0.249052871 | 2.018649351  | 0.584196326  |
| C  | 0.176535812  | 4.046299583  | -0.305548978 |
| C  | 1.422543309  | 1.987694831  | -1.211750965 |
| C  | -1.417355604 | -1.988812438 | -1.204625974 |
| C  | -0.003284583 | -0.001663276 | -4.153792019 |
| C  | -0.666239448 | -1.019335264 | -3.468580635 |
| C  | 0.662464261  | 1.016476056  | -3.472010471 |
| C  | -0.692901340 | -0.951248340 | -2.015014115 |
| C  | 0.694916982  | 0.949468156  | -2.018501954 |
| H  | 3.089783654  | -2.953084745 | 1.745761708  |
| H  | 2.140112363  | -1.556912784 | 2.332500265  |
| H  | -3.073617220 | 2.950870361  | 1.755176036  |
| H  | -2.119543804 | 1.557100367  | 2.340420530  |
| H  | 1.875393370  | 2.721414962  | -1.880532755 |
| H  | 2.225477898  | 1.562485666  | -0.597594692 |
| H  | -1.872948545 | -2.722940141 | -1.871095387 |
| H  | -2.217798837 | -1.563221021 | -0.587480337 |
| H  | -0.005583472 | -0.002066951 | -5.243699467 |
| H  | -1.183798373 | -1.822572389 | -3.983220221 |
| H  | 1.177822697  | 1.819455493  | -3.989257546 |
| H  | -1.901280187 | 3.157584611  | 3.086742192  |
| H  | 1.922443980  | -3.155815455 | 3.082263601  |
| Pd | 0.006641937  | 0.000037118  | 0.698671510  |
| Cl | 0.013232093  | 0.001211041  | 3.052890358  |
| C  | -0.168703876 | -4.047191019 | -0.301457893 |
| C  | -0.643934722 | -5.141863248 | -1.027448314 |
| C  | -0.060071182 | -6.378956088 | -0.755858171 |
| C  | 1.432117908  | -5.425223055 | 0.931813073  |
| C  | 0.960337039  | -6.519464343 | 0.207462338  |
| C  | -0.834159296 | 4.187833404  | 0.656408039  |
| C  | -1.420661919 | 5.424556556  | 0.932165066  |
| C  | -0.952214787 | 6.518399321  | 0.204994206  |
| C  | 0.648448372  | 5.140556530  | -1.034307266 |
| C  | 0.064852417  | 6.377571231  | -0.761783443 |
| H  | -2.203582014 | 5.532791242  | 1.677194503  |
| H  | -1.380821821 | 7.500075136  | 0.385670253  |
| H  | 0.402430583  | 7.253996126  | -1.307710443 |
| H  | 1.430297041  | 5.042419879  | -1.781571223 |
| H  | 2.217531439  | -5.533250780 | 1.674231460  |
| H  | 1.388895684  | -7.501276315 | 0.387578484  |
| H  | -0.400225965 | -7.255705051 | -1.299613211 |
| H  | -1.428366809 | -5.043953889 | -1.772030390 |

---

[Pt(bC^N^bC)Cl]^+

---

|    |              |              |              |
|----|--------------|--------------|--------------|
| N  | -1.042175454 | 2.921074750  | 1.195701336  |
| N  | 0.503506998  | 2.695358820  | -0.312757672 |
| N  | 1.042162510  | -2.921062431 | 1.195694447  |
| N  | -0.503525210 | -2.695371001 | -0.312763473 |
| N  | -0.000017485 | -0.000006193 | -1.338482016 |
| C  | 2.070934746  | -2.647506469 | 2.188402242  |
| C  | -2.070946330 | 2.647535849  | 2.188415053  |
| C  | 0.828523690  | -4.186199951 | 0.652709466  |
| C  | 0.231308860  | -2.019517360 | 0.604690424  |
| C  | -0.231341515 | 2.019515328  | 0.604692446  |
| C  | 0.161536464  | 4.043297577  | -0.327395960 |
| C  | 1.412579737  | 2.004999689  | -1.216256576 |
| C  | -1.412601417 | -2.005021708 | -1.216266826 |
| C  | -0.000004229 | -0.000007764 | -4.117472965 |
| C  | -0.688645649 | -0.980618355 | -3.408083208 |
| C  | 0.688632732  | 0.980601993  | -3.408077604 |
| C  | -0.673447059 | -0.955265441 | -2.018075151 |
| C  | 0.673421632  | 0.955250344  | -2.018069547 |
| H  | 3.034050653  | -3.006432453 | 1.814956957  |
| H  | 2.120263559  | -1.573633415 | 2.360965985  |
| H  | -3.034059379 | 3.006474311  | 1.814974272  |
| H  | -2.120286303 | 1.573663615  | 2.360981855  |
| H  | 1.862296148  | 2.733478796  | -1.889715436 |
| H  | 2.215283203  | 1.536350157  | -0.638369439 |
| H  | -1.862306499 | -2.733505260 | -1.889728401 |
| H  | -2.215312646 | -1.536380310 | -0.638383822 |
| H  | 0.000000697  | -0.000008194 | -5.202902325 |
| H  | -1.234584963 | -1.763688958 | -3.923192936 |
| H  | 1.234579089  | 1.763670448  | -3.923183136 |
| H  | -1.829537325 | 3.154959325  | 3.126109000  |
| H  | 1.829538267  | -3.154931247 | 3.126098697  |
| Pt | -0.000038994 | -0.000004287 | 0.719374940  |
| Cl | -0.000038310 | -0.000004327 | 3.067057428  |
| C  | -0.161534028 | -4.043304424 | -0.327401634 |
| C  | -0.610582908 | -5.129604328 | -1.080012262 |
| C  | -0.022043447 | -6.364679309 | -0.810031734 |
| C  | 1.418584634  | -5.420959738 | 0.927014075  |
| C  | 0.974922455  | -6.508898948 | 0.176367420  |
| C  | -0.828517832 | 4.186208841  | 0.652716101  |
| C  | -1.418557090 | 5.420978365  | 0.927023458  |
| C  | -0.974877512 | 6.508910961  | 0.176377457  |
| C  | 0.610603181  | 5.129590892  | -1.080005558 |
| C  | 0.022084640  | 6.364675499  | -0.810023204 |
| H  | -2.185640492 | 5.532140513  | 1.687573240  |
| H  | -1.407427630 | 7.489152282  | 0.354366486  |
| H  | 0.340622057  | 7.236754261  | -1.373711176 |
| H  | 1.378143988  | 5.029932719  | -1.841551913 |
| H  | 2.185671830  | -5.532109556 | 1.687561837  |
| H  | 1.407490020  | -7.489133020 | 0.354354155  |
| H  | -0.340566435 | -7.236762728 | -1.373720659 |
| H  | -1.378125647 | -5.029958088 | -1.841558232 |

---

[Pt(bC<sup>^</sup>N<sup>^</sup>bC)Cl] (1e<sup>-</sup> reduced)

---

|    |              |              |              |
|----|--------------|--------------|--------------|
| N  | -1.023231623 | 2.922749803  | 1.200642201  |
| N  | 0.527764896  | 2.702242765  | -0.305534040 |
| N  | 1.023332902  | -2.922797667 | 1.200618155  |
| N  | -0.527640079 | -2.702204690 | -0.305557599 |
| N  | 0.000127121  | -0.000010419 | -1.296717278 |
| C  | 2.053581886  | -2.643961738 | 2.188204737  |
| C  | -2.053505050 | 2.643808341  | 2.188171706  |
| C  | 0.820441900  | -4.185873464 | 0.653770122  |
| C  | 0.202770996  | -2.020413570 | 0.609871250  |
| C  | -0.202669089 | 2.020404007  | 0.609837869  |
| C  | 0.173437475  | 4.044209222  | -0.324484620 |
| C  | 1.429003700  | 2.002776113  | -1.225741485 |
| C  | -1.428846577 | -2.002719068 | -1.225770781 |
| C  | -0.000049070 | 0.000143747  | -4.149439595 |
| C  | -0.679068335 | -0.997774509 | -3.400763195 |
| C  | 0.679052819  | 0.997987630  | -3.400744663 |
| C  | -0.680151338 | -0.976859805 | -2.027178296 |
| C  | 0.680303911  | 0.976931545  | -2.027160161 |
| H  | 3.023277515  | -2.973298861 | 1.803086771  |
| H  | 2.076565472  | -1.572264565 | 2.380050456  |
| H  | -3.023295464 | 2.972583922  | 1.802807667  |
| H  | -2.076047413 | 1.572162767  | 2.380365173  |
| H  | 1.892151678  | 2.736775163  | -1.885914657 |
| H  | 2.218422906  | 1.532803590  | -0.624772415 |
| H  | -1.891998296 | -2.736707333 | -1.885953853 |
| H  | -2.218269477 | -1.532744016 | -0.624807055 |
| H  | -0.000118766 | 0.000201980  | -5.234184220 |
| H  | -1.221837745 | -1.793529358 | -3.906116402 |
| H  | 1.221758744  | 1.793796365  | -3.906081239 |
| H  | -1.833765758 | 3.172417793  | 3.120069140  |
| H  | 1.833482288  | -3.172166619 | 3.120248309  |
| Pt | 0.000112198  | 0.000013820  | 0.735160562  |
| Cl | 0.000166063  | 0.000068771  | 3.117493274  |
| C  | -0.173425396 | -4.044201295 | -0.324474526 |
| C  | -0.613302414 | -5.131981239 | -1.081168435 |
| C  | -0.015600946 | -6.365090903 | -0.818961823 |
| C  | 1.419861983  | -5.417922631 | 0.920263488  |
| C  | 0.983742136  | -6.506831030 | 0.165091826  |
| C  | -0.820453737 | 4.185824944  | 0.653747833  |
| C  | -1.419997088 | 5.417825686  | 0.920182482  |
| C  | -0.983963829 | 6.506749272  | 0.164981483  |
| C  | 0.613233811  | 5.132006142  | -1.081199921 |
| C  | 0.015415376  | 6.365070266  | -0.819043766 |
| H  | -2.190048041 | 5.526726765  | 1.678382183  |
| H  | -1.424898417 | 7.484420750  | 0.337598267  |
| H  | 0.327986639  | 7.236621755  | -1.387276053 |
| H  | 1.381931336  | 5.032765505  | -1.841841310 |
| H  | 2.189881388  | -5.526872554 | 1.678488034  |
| H  | 1.424582837  | -7.484537327 | 0.337750942  |
| H  | -0.328234026 | -7.236630328 | -1.387178546 |
| H  | -1.381971987 | -5.032695464 | -1.841832113 |

---

## Crystallography Details for [Ni(bC<sup>N</sup>bC)]OTf

### *Data Collection*

A yellow irregular crystal of C<sub>30</sub>H<sub>33</sub>N<sub>5</sub>O<sub>3</sub>F<sub>3</sub>SCINi having approximate dimensions of 0.02 × 0.17 × 0.21 mm was mounted on a glass fiber. All measurements were made on a Bruker APEX DUO diffractometer with a TRIUMPH curved-crystal monochromator with Mo-K $\alpha$  radiation.

The data were collected at a temperature of  $-183.0 \pm 0.1^\circ\text{C}$  to a maximum  $2\theta$  value of  $60.4^\circ$ . Data were collected in a series of  $\phi$  and  $\omega$  scans in  $0.5^\circ$  oscillations using 10.0-second exposures. The crystal-to-detector distance was 40.13 mm.

### *Data Reduction*

Of the 39661 reflections that were collected, 9056 were unique ( $R_{\text{int}} = 0.043$ ); equivalent reflections were merged. Data were collected and integrated using the Bruker SAINT<sup>1</sup> software package. The linear absorption coefficient,  $\mu$ , for Mo-K $\alpha$  radiation is  $8.43 \text{ cm}^{-1}$ . Data were corrected for absorption effects using the multi-scan technique (SADABS<sup>2</sup>), with minimum and maximum transmission coefficients of 0.902 and 0.983, respectively. The data were corrected for Lorentz and polarization effects.

### *Structure Solution and Refinement*

The structure was solved by direct methods.<sup>3</sup> All non-hydrogen atoms were refined anisotropically. All hydrogen atoms were placed in calculated positions. The final cycle of full-matrix least-squares refinement<sup>4</sup> on  $F^2$  was based on 9056 reflections and 399 variable parameters and converged (largest parameter shift was 0.00 times its esd) with unweighted and weighted agreement factors of:

$$R1 (I > 2.00\sigma(I)) = \sum ||F_o| - |F_c|| / \sum |F_o| = 0.034$$

$$wR2 (\text{all data}) = [ \sum ( w (F_o^2 - F_c^2)^2 ) / \sum w(F_o^2)^2 ]^{1/2} = 0.080$$

The standard deviation of an observation of unit weight<sup>5</sup> was 1.02. The weighting scheme was based on counting statistics. The maximum and minimum peaks on the final difference Fourier map corresponded to 0.51 and  $-0.45 \text{ e}^-/\text{\AA}^3$ , respectively.

Neutral atom scattering factors were taken from Cromer and Waber.<sup>6</sup> Anomalous dispersion effects were included in  $F_{\text{calc}}^7$ ; the values for  $\Delta f'$  and  $\Delta f''$  were those of Creagh and McAuley.<sup>8</sup> The values for the mass attenuation coefficients are those of Creagh and Hubbell.<sup>9</sup> All refinements were performed using the XL<sup>10</sup> via the OLEX2<sup>11</sup> interface.

## References

- (1) SAINT. Version 8.34A Bruker AXS Inc., Madison, Wisconsin, USA. (1997-2013).
- (2) SADABS 2014/5 - Krause, L., Herbst-Irmer, R., Sheldrick, G. M. & Stalke, D. (2015). *J. Appl. Crystallogr.* **48**.
- (3) SHELXT: Sheldrick, G. M.; *Acta Cryst.*, A71, 3-8 (2015).
- (4) Least Squares function minimized:
$$\sum w(F_o^2 - F_c^2)^2$$
- (5) Standard deviation of an observation of unit weight:
$$[\sum w(F_o^2 - F_c^2)^2 / (N_o - N_v)]^{1/2}$$
where:  $N_o$  = number of observations  
 $N_v$  = number of variables
- (6) Cromer, D. T. & Waber, J. T.; "International Tables for X-ray Crystallography", Vol. IV, The Kynoch Press, Birmingham, England, Table 2.2 A (1974).
- (7) Ibers, J. A. & Hamilton, W. C.; *Acta Crystallogr.*, 17, 781 (1964).
- (8) Creagh, D. C. & McAuley, W.J. ; "International Tables for Crystallography", Vol C, (A.J.C. Wilson, ed.), Kluwer Academic Publishers, Boston, Table 4.2.6.8, pages 219-222 (1992).
- (9) Creagh, D. C. & Hubbell, J.H.; "International Tables for Crystallography", Vol C, (A.J.C. Wilson, ed.), Kluwer Academic Publishers, Boston, Table 4.2.4.3, pages 200-206 (1992).
- (10) XL Sheldrick, G. M.; *Acta Cryst.*, A64, 112-122 (2008).
- (11) OLEX2 – V1.2.6 Dolomanov, O.V.; Bourhis, L.J.; Gildea, R.J.; Howard, J.A.K.; Puschmann, H., *OLEX2: A complete structure solution, refinement and analysis program* (2009). *J. Appl. Cryst.*, 42, 339-341

## ***Experimental Details:***

### **A. Crystal Data**

|                       |                                                                                                                                                                                 |
|-----------------------|---------------------------------------------------------------------------------------------------------------------------------------------------------------------------------|
| Empirical Formula     | C <sub>30</sub> H <sub>33</sub> N <sub>5</sub> O <sub>3</sub> F <sub>3</sub> SCINi                                                                                              |
| Formula Weight        | 694.83                                                                                                                                                                          |
| Crystal Colour, Habit | yellow, irregular                                                                                                                                                               |
| Crystal Dimensions    | 0.02 x 0.17 x 0.21 mm                                                                                                                                                           |
| Crystal System        | triclinic                                                                                                                                                                       |
| Lattice Type          | Primitive                                                                                                                                                                       |
| Lattice Parameters    | a = 10.561(3) Å<br>b = 10.647(3) Å<br>c = 14.867(4) Å<br>α = 89.824(4) <sup>o</sup><br>β = 89.273(8) <sup>o</sup><br>γ = 67.244(8) <sup>o</sup><br>V = 1541.4(8) Å <sup>3</sup> |
| Space Group           | <i>P</i> -1 (#2)                                                                                                                                                                |
| Z value               | 2                                                                                                                                                                               |
| D <sub>calc</sub>     | 1.497 g/cm <sup>3</sup>                                                                                                                                                         |
| F <sub>000</sub>      | 720.00                                                                                                                                                                          |
| μ(Mo-Kα)              | 8.43 cm <sup>-1</sup>                                                                                                                                                           |

### **B. Intensity Measurements**

|                             |                                                                                                                                    |
|-----------------------------|------------------------------------------------------------------------------------------------------------------------------------|
| Diffractometer              | Bruker APEX DUO                                                                                                                    |
| Radiation                   | Mo-Kα (λ = 0.71073 Å)                                                                                                              |
| Data Images                 | 2288 exposures @ 10.0 seconds                                                                                                      |
| Detector Position           | 40.13 mm                                                                                                                           |
| 2θ <sub>max</sub>           | 60.4 <sup>o</sup>                                                                                                                  |
| No. of Reflections Measured | Total: 39661                                                                                                                       |
| Corrections                 | Unique: 9056 (R <sub>int</sub> = 0.043)<br>Absorption (T <sub>min</sub> = 0.902, T <sub>max</sub> = 0.983)<br>Lorentz-polarization |



### C. Structure Solution and Refinement

|                                                  |                                               |
|--------------------------------------------------|-----------------------------------------------|
| Structure Solution                               | Direct Methods (XT)                           |
| Refinement                                       | Full-matrix least-squares on $F^2$            |
| Function Minimized                               | $\sum w (F_o^2 - F_c^2)^2$                    |
| Least Squares Weights                            | $w=1/(\sigma^2(F_o^2)+(0.0325P)^2 + 0.8300P)$ |
| Anomalous Dispersion                             | All non-hydrogen atoms                        |
| No. Observations ( $I>0.00\sigma(I)$ )           | 9056                                          |
| No. Variables                                    | 399                                           |
| Reflection/Parameter Ratio                       | 22.70                                         |
| Residuals (refined on $F^2$ , all data): R1; wR2 | 0.051; 0.080                                  |
| Goodness of Fit Indicator                        | 1.02                                          |
| No. Observations ( $I>2.00\sigma(I)$ )           | 7233                                          |
| Residuals (refined on $F^2$ ): R1; wR2           | 0.034; 0.074                                  |
| Max Shift/Error in Final Cycle                   | 0.00                                          |
| Maximum peak in Final Diff. Map                  | 0.51 e <sup>-</sup> /Å <sup>3</sup>           |
| Minimum peak in Final Diff. Map                  | -0.45 e <sup>-</sup> /Å <sup>3</sup>          |

**Table S1.** Fractional Atomic Coordinates ( $\times 10^4$ ) and Equivalent Isotropic Displacement Parameters ( $\text{\AA}^2 \times 10^3$ ) for  $[\text{Ni}(\text{bC}^{\wedge}\text{N}^{\wedge}\text{bC})\text{Cl}]\text{OTf}$ .  $U_{\text{eq}}$  is defined as 1/3 of the trace of the orthogonalised  $U_{ij}$  tensor.

| Atom | <i>x</i>    | <i>y</i>    | <i>z</i>    | <i>U</i> (eq) |
|------|-------------|-------------|-------------|---------------|
| Ni1  | 2684.0(2)   | 7141.6(2)   | 7302.3(2)   | 9.03(5)       |
| Cl1  | 1681.0(4)   | 8906.3(4)   | 8154.4(2)   | 12.93(8)      |
| N1   | 2545.9(13)  | 9393.0(13)  | 6003.9(9)   | 10.8(2)       |
| N2   | 1862.4(13)  | 7841.8(13)  | 5516.3(8)   | 9.9(2)        |
| N3   | 3579.6(13)  | 5577.5(13)  | 6548.6(8)   | 9.6(2)        |
| N4   | 4341.9(13)  | 5002.4(13)  | 8392.9(8)   | 10.1(2)       |
| N5   | 2327.7(13)  | 5761.0(13)  | 9030.1(8)   | 9.9(2)        |
| C1   | 2384.9(16)  | 8232.2(15)  | 6244.6(10)  | 10.6(3)       |
| C2   | 1655.8(15)  | 8757.6(15)  | 4809.6(10)  | 10.3(3)       |
| C3   | 1134.4(16)  | 8796.9(16)  | 3945.9(10)  | 12.5(3)       |
| C4   | 1088.9(17)  | 9878.9(17)  | 3402.0(11)  | 15.3(3)       |
| C5   | 1524.9(17)  | 10886.2(17) | 3715.9(11)  | 16.0(3)       |
| C6   | 2028.6(17)  | 10855.5(16) | 4579.8(11)  | 14.5(3)       |
| C7   | 2093.7(16)  | 9757.0(15)  | 5122(1)     | 10.9(3)       |
| C8   | 3138.1(17)  | 10148.6(16) | 6576.4(11)  | 13.3(3)       |
| C9   | 4564.7(17)  | 9268.2(17)  | 6909.8(12)  | 17.5(3)       |
| C10  | 5192(2)     | 10094(2)    | 7461.4(13)  | 23.2(4)       |
| C11  | 4335(2)     | 10795(2)    | 8284.9(13)  | 28.5(4)       |
| C12  | 1674.2(16)  | 6548.6(15)  | 5498.3(10)  | 11.0(3)       |
| C13  | 2992.2(16)  | 5410.0(15)  | 5777.3(10)  | 10.7(3)       |
| C14  | 3574.9(17)  | 4243.5(16)  | 5254.3(10)  | 13.1(3)       |
| C15  | 4808.9(17)  | 3240.4(17)  | 5518.8(11)  | 15.8(3)       |
| C16  | 5426.2(17)  | 3428.4(16)  | 6298.2(11)  | 13.7(3)       |
| C17  | 4789.4(16)  | 4596.8(16)  | 6802.7(10)  | 10.7(3)       |
| C18  | 5371.3(16)  | 4822.6(16)  | 7685(1)     | 11.9(3)       |
| C19  | 3046.8(16)  | 5943.5(15)  | 8315.3(10)  | 10.1(3)       |
| C20  | 4473.2(16)  | 4202.0(15)  | 9156.8(10)  | 10.5(3)       |
| C21  | 5587.2(17)  | 3142.3(16)  | 9522.1(10)  | 12.8(3)       |
| C22  | 5341.1(18)  | 2569.7(16)  | 10313.2(11) | 15.7(3)       |
| C23  | 4031.8(19)  | 3045.1(17)  | 10719.1(11) | 16.7(3)       |
| C24  | 2927.7(17)  | 4114.0(16)  | 10360.2(10) | 13.9(3)       |
| C25  | 3176.1(16)  | 4689.9(16)  | 9566(1)     | 11.2(3)       |
| C26  | 849.2(16)   | 6494.3(16)  | 9191.3(10)  | 12.4(3)       |
| C27  | 524.3(17)   | 7472.6(17)  | 9994.0(11)  | 15.1(3)       |
| C28  | -1020.2(18) | 8183.3(18)  | 10169.9(12) | 19.7(3)       |
| C29  | -1803(2)    | 9077(2)     | 9392.3(14)  | 29.1(4)       |
| S1   | 8728.5(4)   | 5281.7(4)   | 6898.1(3)   | 12.89(8)      |
| F1   | 10952.0(12) | 3226.2(12)  | 6398.6(9)   | 36.3(3)       |
| F2   | 10473.8(14) | 3247.5(15)  | 7812(1)     | 48.8(4)       |

|     |              |             |             |          |
|-----|--------------|-------------|-------------|----------|
| F3  | 11334.3 (11) | 4636.5 (13) | 7284.4 (8)  | 29.8 (3) |
| O1  | 7966.5 (13)  | 4426.5 (13) | 6759.3 (8)  | 19.6 (3) |
| O2  | 8912.7 (13)  | 5960.2 (13) | 6095.7 (8)  | 19.9 (3) |
| O3  | 8380.5 (15)  | 6103.3 (15) | 7701.6 (9)  | 31.2 (3) |
| C30 | 10455.5 (19) | 4038.5 (19) | 7114.5 (12) | 21.2 (4) |

**Table S2.** Anisotropic Displacement Parameters ( $\text{\AA}^2 \times 10^3$ ) for  $[\text{Ni}(\text{bC}^{\wedge}\text{N}^{\wedge}\text{bC})\text{Cl}]\text{OTf}$ . The anisotropic displacement factor exponent takes the form:  $-2\pi^2[\text{h}^2\text{a}^*2\text{U}_{11}+2\text{hka}^*\text{b}^*\text{U}_{12}+\dots]$ .

| Atom | $\text{U}_{11}$ | $\text{U}_{22}$ | $\text{U}_{33}$ | $\text{U}_{23}$ | $\text{U}_{13}$ | $\text{U}_{12}$ |
|------|-----------------|-----------------|-----------------|-----------------|-----------------|-----------------|
| Ni1  | 9.83 (10)       | 8.55 (10)       | 7.25 (9)        | -0.18 (7)       | 0.02 (7)        | -1.94 (8)       |
| Cl1  | 14.47 (18)      | 11.49 (17)      | 10.07 (16)      | -1.70 (13)      | -0.27 (13)      | -1.96 (14)      |
| N1   | 10.8 (6)        | 9.6 (6)         | 11.0 (6)        | -0.2 (5)        | -0.5 (5)        | -2.8 (5)        |
| N2   | 11.3 (6)        | 9.5 (6)         | 8.6 (6)         | 0.6 (5)         | -0.4 (5)        | -3.6 (5)        |
| N3   | 8.9 (6)         | 10.3 (6)        | 9.6 (6)         | 0.4 (5)         | 1.5 (5)         | -3.9 (5)        |
| N4   | 8.5 (6)         | 11.4 (6)        | 9.2 (6)         | 0.4 (5)         | 0.4 (5)         | -2.6 (5)        |
| N5   | 8.1 (6)         | 12.4 (6)        | 8.1 (6)         | -1.0 (5)        | 0.2 (5)         | -2.8 (5)        |
| C1   | 9.1 (7)         | 9.8 (7)         | 11.4 (7)        | -1.3 (5)        | 0.6 (5)         | -1.9 (6)        |
| C2   | 8.4 (7)         | 8.6 (7)         | 11.3 (7)        | 1.0 (5)         | 1.2 (5)         | -0.4 (6)        |
| C3   | 9.0 (7)         | 13.8 (7)        | 11.6 (7)        | -1.4 (6)        | -0.2 (6)        | -1.2 (6)        |
| C4   | 13.8 (8)        | 15.8 (8)        | 10.9 (7)        | 1.9 (6)         | -0.2 (6)        | 0.0 (6)         |
| C5   | 15.1 (8)        | 13.5 (7)        | 15.2 (8)        | 4.6 (6)         | 1.3 (6)         | -1.0 (6)        |
| C6   | 13.3 (8)        | 10.6 (7)        | 17.2 (8)        | 1.0 (6)         | 1.6 (6)         | -1.9 (6)        |
| C7   | 8.5 (7)         | 11.0 (7)        | 10.8 (7)        | 1.2 (5)         | 0.7 (5)         | -1.3 (6)        |
| C8   | 15.2 (8)        | 10.8 (7)        | 14.7 (7)        | -1.9 (6)        | -2.3 (6)        | -5.7 (6)        |
| C9   | 14.4 (8)        | 18.1 (8)        | 19.5 (8)        | -1.5 (6)        | -2.2 (6)        | -5.6 (7)        |
| C10  | 22.4 (9)        | 27.6 (10)       | 25.4 (9)        | 2.8 (7)         | -7.2 (7)        | -16.0 (8)       |
| C11  | 35.3 (11)       | 26.7 (10)       | 26.9 (10)       | -5.8 (8)        | -8.9 (8)        | -15.4 (9)       |
| C12  | 11.5 (7)        | 10.1 (7)        | 11.5 (7)        | 0.8 (5)         | -1.7 (6)        | -4.2 (6)        |
| C13  | 11.8 (7)        | 12.1 (7)        | 9.8 (7)         | 1.5 (5)         | 0.3 (5)         | -6.5 (6)        |
| C14  | 13.3 (7)        | 14.9 (8)        | 10.9 (7)        | -1.9 (6)        | 0.0 (6)         | -5.3 (6)        |
| C15  | 17.2 (8)        | 11.9 (7)        | 16.1 (8)        | -4.7 (6)        | 3.2 (6)         | -3.3 (7)        |
| C16  | 10.7 (7)        | 13.2 (7)        | 14.1 (7)        | -0.2 (6)        | 1.9 (6)         | -1.2 (6)        |
| C17  | 9.8 (7)         | 12.6 (7)        | 9.6 (7)         | 0.8 (5)         | 2.0 (5)         | -4.4 (6)        |
| C18  | 9.0 (7)         | 14.2 (7)        | 11.3 (7)        | 0.2 (6)         | 1.3 (5)         | -3.3 (6)        |
| C19  | 9.9 (7)         | 11.1 (7)        | 9.2 (7)         | -2.5 (5)        | -0.3 (5)        | -4.0 (6)        |
| C20  | 11.9 (7)        | 10.7 (7)        | 9.4 (7)         | 0.2 (5)         | -2.1 (5)        | -4.7 (6)        |
| C21  | 12.3 (7)        | 13.3 (7)        | 12.8 (7)        | -1.2 (6)        | -3.2 (6)        | -4.7 (6)        |
| C22  | 19.8 (8)        | 12.8 (7)        | 14.0 (7)        | 2.5 (6)         | -6.6 (6)        | -5.7 (7)        |
| C23  | 25.4 (9)        | 16.8 (8)        | 11.1 (7)        | 3.2 (6)         | -4.5 (6)        | -11.6 (7)       |
| C24  | 18.3 (8)        | 15.8 (8)        | 10.5 (7)        | -1.2 (6)        | 0.4 (6)         | -9.9 (7)        |
| C25  | 13.0 (7)        | 12.5 (7)        | 9.4 (7)         | -0.6 (5)        | -2.9 (5)        | -6.2 (6)        |

|     |            |            |            |            |           |            |
|-----|------------|------------|------------|------------|-----------|------------|
| C26 | 9.0 (7)    | 16.2 (8)   | 11.2 (7)   | -2.0 (6)   | 1.2 (5)   | -3.9 (6)   |
| C27 | 13.2 (8)   | 20.2 (8)   | 11.6 (7)   | -3.3 (6)   | -0.1 (6)  | -6.2 (7)   |
| C28 | 15.2 (8)   | 21.9 (9)   | 19.6 (8)   | -7.8 (7)   | 5.0 (7)   | -4.4 (7)   |
| C29 | 17.6 (9)   | 27.4 (10)  | 31.7 (11)  | -5.5 (8)   | -1.8 (8)  | 3.0 (8)    |
| S1  | 13.71 (19) | 14.70 (19) | 11.09 (17) | -2.32 (14) | 2.38 (14) | -6.46 (16) |
| F1  | 21.1 (6)   | 25.7 (6)   | 53.6 (8)   | -14.1 (6)  | 2.9 (6)   | 0.1 (5)    |
| F2  | 35.0 (7)   | 58.6 (9)   | 54.6 (9)   | 43.9 (7)   | -15.5 (6) | -19.7 (7)  |
| F3  | 21.5 (6)   | 43.6 (7)   | 31.8 (6)   | 3.8 (5)    | -8.0 (5)  | -20.5 (6)  |
| O1  | 17.0 (6)   | 23.1 (6)   | 22.9 (6)   | -0.1 (5)   | 2.3 (5)   | -12.5 (5)  |
| O2  | 21.6 (6)   | 21.2 (6)   | 18.7 (6)   | 6.4 (5)    | -2.2 (5)  | -10.2 (5)  |
| O3  | 35.4 (8)   | 35.6 (8)   | 23.0 (7)   | -17.3 (6)  | 10.1 (6)  | -14.3 (7)  |
| C30 | 19.5 (9)   | 24.8 (9)   | 21.8 (9)   | 6.9 (7)    | -2.5 (7)  | -11.4 (8)  |

**Table S3.** Bond Lengths for [Ni(bC<sup>^</sup>N<sup>^</sup>bC)Cl]OTf.

| Atom | Atom | Length/Å    | Atom | Atom | Length/Å    |
|------|------|-------------|------|------|-------------|
| Ni1  | Cl1  | 2.1675 (6)  | C9   | C10  | 1.534 (2)   |
| Ni1  | N3   | 1.9207 (14) | C10  | C11  | 1.526 (3)   |
| Ni1  | C1   | 1.9075 (16) | C12  | C13  | 1.512 (2)   |
| Ni1  | C19  | 1.9150 (15) | C13  | C14  | 1.389 (2)   |
| N1   | C1   | 1.3574 (19) | C14  | C15  | 1.388 (2)   |
| N1   | C7   | 1.4023 (19) | C15  | C16  | 1.389 (2)   |
| N1   | C8   | 1.4730 (19) | C16  | C17  | 1.381 (2)   |
| N2   | C1   | 1.3583 (19) | C17  | C18  | 1.514 (2)   |
| N2   | C2   | 1.3918 (19) | C20  | C21  | 1.392 (2)   |
| N2   | C12  | 1.4655 (19) | C20  | C25  | 1.395 (2)   |
| N3   | C13  | 1.3552 (19) | C21  | C22  | 1.390 (2)   |
| N3   | C17  | 1.358 (2)   | C22  | C23  | 1.404 (3)   |
| N4   | C18  | 1.462 (2)   | C23  | C24  | 1.387 (2)   |
| N4   | C19  | 1.353 (2)   | C24  | C25  | 1.397 (2)   |
| N4   | C20  | 1.3935 (19) | C26  | C27  | 1.532 (2)   |
| N5   | C19  | 1.3550 (19) | C27  | C28  | 1.529 (2)   |
| N5   | C25  | 1.400 (2)   | C28  | C29  | 1.528 (3)   |
| N5   | C26  | 1.468 (2)   | S1   | O1   | 1.4462 (12) |
| C2   | C3   | 1.398 (2)   | S1   | O2   | 1.4423 (12) |
| C2   | C7   | 1.397 (2)   | S1   | O3   | 1.4400 (14) |
| C3   | C4   | 1.391 (2)   | S1   | C30  | 1.824 (2)   |
| C4   | C5   | 1.404 (2)   | F1   | C30  | 1.340 (2)   |
| C5   | C6   | 1.392 (2)   | F2   | C30  | 1.329 (2)   |
| C6   | C7   | 1.398 (2)   | F3   | C30  | 1.340 (2)   |
| C8   | C9   | 1.522 (2)   |      |      |             |

**Table S4.** Bond angles for [Ni(bC<sup>^</sup>N<sup>^</sup>bC)Cl]OTf.

| Atom | Atom | Atom | Angle/°     | Atom | Atom | Atom | Angle/°     |
|------|------|------|-------------|------|------|------|-------------|
| N3   | Ni1  | Cl1  | 179.78 (4)  | N3   | C13  | C12  | 117.55 (13) |
| C1   | Ni1  | Cl1  | 92.35 (5)   | N3   | C13  | C14  | 121.70 (14) |
| C1   | Ni1  | N3   | 87.69 (6)   | C14  | C13  | C12  | 120.75 (14) |
| C1   | Ni1  | C19  | 176.21 (6)  | C15  | C14  | C13  | 118.97 (14) |
| C19  | Ni1  | Cl1  | 91.43 (5)   | C14  | C15  | C16  | 119.24 (15) |
| C19  | Ni1  | N3   | 88.52 (6)   | C17  | C16  | C15  | 119.42 (15) |
| C1   | N1   | C7   | 110.22 (12) | N3   | C17  | C16  | 121.53 (14) |
| C1   | N1   | C8   | 125.08 (13) | N3   | C17  | C18  | 116.60 (13) |
| C7   | N1   | C8   | 124.68 (13) | C16  | C17  | C18  | 121.83 (14) |
| C1   | N2   | C2   | 111.34 (12) | N4   | C18  | C17  | 108.28 (12) |
| C1   | N2   | C12  | 121.64 (12) | N4   | C19  | Ni1  | 116.94 (11) |
| C2   | N2   | C12  | 126.83 (12) | N4   | C19  | N5   | 106.34 (13) |
| C13  | N3   | Ni1  | 120.75 (11) | N5   | C19  | Ni1  | 136.72 (12) |
| C13  | N3   | C17  | 119.11 (13) | N4   | C20  | C25  | 105.49 (13) |
| C17  | N3   | Ni1  | 120.08 (10) | C21  | C20  | N4   | 132.31 (15) |
| C19  | N4   | C18  | 121.08 (13) | C21  | C20  | C25  | 122.19 (14) |
| C19  | N4   | C20  | 111.33 (13) | C22  | C21  | C20  | 116.64 (15) |
| C20  | N4   | C18  | 127.28 (13) | C21  | C22  | C23  | 121.29 (15) |
| C19  | N5   | C25  | 110.22 (13) | C24  | C23  | C22  | 121.95 (15) |
| C19  | N5   | C26  | 125.54 (13) | C23  | C24  | C25  | 116.72 (15) |
| C25  | N5   | C26  | 124.07 (13) | C20  | C25  | N5   | 106.61 (13) |
| N1   | C1   | Ni1  | 135.92 (11) | C20  | C25  | C24  | 121.20 (15) |
| N1   | C1   | N2   | 106.21 (13) | C24  | C25  | N5   | 132.19 (15) |
| N2   | C1   | Ni1  | 117.86 (11) | N5   | C26  | C27  | 113.07 (13) |
| N2   | C2   | C3   | 132.16 (14) | C28  | C27  | C26  | 112.07 (13) |
| N2   | C2   | C7   | 105.63 (13) | C29  | C28  | C27  | 113.81 (15) |
| C7   | C2   | C3   | 122.21 (14) | O1   | S1   | C30  | 102.42 (8)  |
| C4   | C3   | C2   | 116.53 (15) | O2   | S1   | O1   | 113.96 (7)  |
| C3   | C4   | C5   | 121.33 (15) | O2   | S1   | C30  | 103.10 (8)  |
| C6   | C5   | C4   | 122.12 (15) | O3   | S1   | O1   | 115.77 (8)  |
| C5   | C6   | C7   | 116.57 (15) | O3   | S1   | O2   | 115.48 (9)  |
| C2   | C7   | N1   | 106.58 (13) | O3   | S1   | C30  | 103.57 (9)  |
| C2   | C7   | C6   | 121.24 (14) | F1   | C30  | S1   | 110.62 (12) |
| C6   | C7   | N1   | 132.19 (14) | F2   | C30  | S1   | 111.75 (13) |
| N1   | C8   | C9   | 112.86 (13) | F2   | C30  | F1   | 107.50 (16) |
| C8   | C9   | C10  | 111.91 (14) | F2   | C30  | F3   | 107.66 (15) |
| C11  | C10  | C9   | 113.95 (15) | F3   | C30  | S1   | 111.98 (13) |
| N2   | C12  | C13  | 109.24 (12) | F3   | C30  | F1   | 107.10 (15) |

**Table S5.** Torsion Angles for [Ni(bC<sup>N</sup>bC)Cl]OTf.

| A   | B   | C   | D   | Angle/°      | A   | B   | C   | D   | Angle/°      |
|-----|-----|-----|-----|--------------|-----|-----|-----|-----|--------------|
| Ni1 | N3  | C13 | C12 | 4.87 (18)    | C13 | N3  | C17 | C18 | -178.17 (13) |
| Ni1 | N3  | C13 | C14 | -175.52 (11) | C13 | C14 | C15 | C16 | 0.1 (2)      |
| Ni1 | N3  | C17 | C16 | 176.81 (11)  | C14 | C15 | C16 | C17 | 1.1 (2)      |
| Ni1 | N3  | C17 | C18 | -0.69 (17)   | C15 | C16 | C17 | N3  | -0.9 (2)     |
| N1  | C8  | C9  | C10 | 176.90 (14)  | C15 | C16 | C17 | C18 | 176.51 (14)  |
| N2  | C2  | C3  | C4  | -179.27 (16) | C16 | C17 | C18 | N4  | -120.90 (15) |
| N2  | C2  | C7  | N1  | 0.08 (16)    | C17 | N3  | C13 | C12 | -177.67 (13) |
| N2  | C2  | C7  | C6  | -179.83 (14) | C17 | N3  | C13 | C14 | 1.9 (2)      |
| N2  | C12 | C13 | N3  | 50.64 (17)   | C18 | N4  | C19 | Ni1 | -6.18 (18)   |
| N2  | C12 | C13 | C14 | -128.97 (14) | C18 | N4  | C19 | N5  | 174.18 (12)  |
| N3  | C13 | C14 | C15 | -1.6 (2)     | C18 | N4  | C20 | C21 | 7.7 (3)      |
| N3  | C17 | C18 | N4  | 56.59 (17)   | C18 | N4  | C20 | C25 | -173.64 (14) |
| N4  | C20 | C21 | C22 | 179.59 (15)  | C19 | N4  | C18 | C17 | -53.48 (18)  |
| N4  | C20 | C25 | N5  | -0.09 (16)   | C19 | N4  | C20 | C21 | -178.65 (16) |
| N4  | C20 | C25 | C24 | 179.92 (13)  | C19 | N4  | C20 | C25 | 0.02 (17)    |
| N5  | C26 | C27 | C28 | -177.84 (13) | C19 | N5  | C25 | C20 | 0.14 (17)    |
| C1  | N1  | C7  | C2  | -0.86 (17)   | C19 | N5  | C25 | C24 | -179.88 (16) |
| C1  | N1  | C7  | C6  | 179.04 (17)  | C19 | N5  | C26 | C27 | -111.11 (16) |
| C1  | N1  | C8  | C9  | 55.4 (2)     | C20 | N4  | C18 | C17 | 119.62 (15)  |
| C1  | N2  | C2  | C3  | -179.16 (16) | C20 | N4  | C19 | Ni1 | 179.71 (10)  |
| C1  | N2  | C2  | C7  | 0.72 (17)    | C20 | N4  | C19 | N5  | 0.06 (17)    |
| C1  | N2  | C12 | C13 | -50.41 (18)  | C20 | C21 | C22 | C23 | -0.1 (2)     |
| C2  | N2  | C1  | Ni1 | 177.90 (10)  | C21 | C20 | C25 | N5  | 178.74 (13)  |
| C2  | N2  | C1  | N1  | -1.25 (17)   | C21 | C20 | C25 | C24 | -1.2 (2)     |
| C2  | N2  | C12 | C13 | 124.17 (15)  | C21 | C22 | C23 | C24 | -0.8 (2)     |
| C2  | C3  | C4  | C5  | -1.0 (2)     | C22 | C23 | C24 | C25 | 0.7 (2)      |
| C3  | C2  | C7  | N1  | 179.98 (14)  | C23 | C24 | C25 | N5  | -179.66 (15) |
| C3  | C2  | C7  | C6  | 0.1 (2)      | C23 | C24 | C25 | C20 | 0.3 (2)      |
| C3  | C4  | C5  | C6  | 0.3 (3)      | C25 | N5  | C19 | Ni1 | -179.66 (12) |
| C4  | C5  | C6  | C7  | 0.6 (2)      | C25 | N5  | C19 | N4  | -0.13 (16)   |
| C5  | C6  | C7  | N1  | 179.30 (16)  | C25 | N5  | C26 | C27 | 74.12 (18)   |
| C5  | C6  | C7  | C2  | -0.8 (2)     | C25 | C20 | C21 | C22 | 1.1 (2)      |
| C7  | N1  | C1  | Ni1 | -177.63 (13) | C26 | N5  | C19 | Ni1 | 5.0 (2)      |
| C7  | N1  | C1  | N2  | 1.28 (17)    | C26 | N5  | C19 | N4  | -175.51 (13) |
| C7  | N1  | C8  | C9  | -123.18 (16) | C26 | N5  | C25 | C20 | 175.61 (13)  |
| C7  | C2  | C3  | C4  | 0.9 (2)      | C26 | N5  | C25 | C24 | -4.4 (3)     |
| C8  | N1  | C1  | Ni1 | 3.6 (3)      | C26 | C27 | C28 | C29 | -62.2 (2)    |
| C8  | N1  | C1  | N2  | -177.46 (13) | O1  | S1  | C30 | F1  | 62.07 (13)   |
| C8  | N1  | C7  | C2  | 177.89 (14)  | O1  | S1  | C30 | F2  | -57.66 (15)  |
| C8  | N1  | C7  | C6  | -2.2 (3)     | O1  | S1  | C30 | F3  | -178.54 (12) |
| C8  | C9  | C10 | C11 | 58.5 (2)     | O2  | S1  | C30 | F1  | -56.49 (13)  |

C12N2 C1 Ni1 -6.75(19) O2 S1 C30F2 -176.23(13)  
 C12N2 C1 N1 174.10(13) O2 S1 C30F3 62.89(14)  
 C12N2 C2 C3 5.8(3) O3 S1 C30F1 -177.19(12)  
 C12N2 C2 C7 -174.33(14) O3 S1 C30F2 63.08(16)  
 C12C13C14C15 177.95(14) O3 S1 C30F3 -57.81(14)  
 C13N3 C17C16 -0.7(2)

**Table S6.** Hydrogen Atom Coordinates ( $\text{\AA}\times 10^4$ ) and Isotropic Displacement Parameters ( $\text{\AA}^2\times 10^3$ ) for  $[\text{Ni}(\text{bC}^{\wedge}\text{N}^{\wedge}\text{bC})\text{Cl}]\text{OTf}$ .

| Atom | <i>x</i> | <i>y</i> | <i>z</i> | U(eq) |
|------|----------|----------|----------|-------|
| H3   | 827      | 8120     | 3741     | 15    |
| H4   | 756      | 9937     | 2806     | 18    |
| H5   | 1474     | 11612    | 3326     | 19    |
| H6   | 2313     | 11545    | 4790     | 17    |
| H8A  | 2522     | 10525    | 7101     | 16    |
| H8B  | 3190     | 10924    | 6231     | 16    |
| H9A  | 5172     | 8852     | 6387     | 21    |
| H9B  | 4507     | 8522     | 7286     | 21    |
| H10A | 6115     | 9478     | 7662     | 28    |
| H10B | 5309     | 10794    | 7068     | 28    |
| H11A | 3474     | 11510    | 8090     | 43    |
| H11B | 4850     | 11200    | 8646     | 43    |
| H11C | 4131     | 10124    | 8647     | 43    |
| H12A | 1427     | 6374     | 4884     | 13    |
| H12B | 919      | 6594     | 5915     | 13    |
| H14  | 3136     | 4134     | 4724     | 16    |
| H15  | 5226     | 2435     | 5171     | 19    |
| H16  | 6279     | 2759     | 6483     | 16    |
| H18A | 6223     | 4029     | 7822     | 14    |
| H18B | 5596     | 5642     | 7645     | 14    |
| H21  | 6471     | 2826     | 9245     | 15    |
| H22  | 6073     | 1843     | 10584    | 19    |
| H23  | 3898     | 2622     | 11256    | 20    |
| H24  | 2046     | 4438     | 10641    | 17    |
| H26A | 425      | 5824     | 9299     | 15    |
| H26B | 432      | 7017     | 8645     | 15    |
| H27A | 967      | 6958     | 10537    | 18    |
| H27B | 914      | 8168     | 9877     | 18    |
| H28A | -1402    | 7483     | 10291    | 24    |
| H28B | -1171    | 8755     | 10716    | 24    |
| H29A | -1739    | 8506     | 8864     | 44    |

|      |       |      |      |    |
|------|-------|------|------|----|
| H29B | -1403 | 9745 | 9247 | 44 |
| H29C | -2769 | 9554 | 9567 | 44 |
